# Supplementary material
Source: ML conference proceedings conference paper supplement (https://openaccess.thecvf.com/content/WACV2024/html/Ye_Label_Shift_Estimation_WACV_2024_paper.html)
Supplement: Supplementary file 1 [file Ye_Label_Shift_Estimation_WACV_2024_supplemental.pdf]

## Contents

|                                                           |           |
|-----------------------------------------------------------|-----------|
| <b>A More Discussions on EM</b>                           | <b>12</b> |
| A.1. EM Basics                                            | 12        |
| A.2. EM Advantages                                        | 12        |
| <b>B Mathematical Proofs</b>                              | <b>13</b> |
| B.1. Proof of Convexity of MAP objective                  | 13        |
| B.2. Proof of EM for MAP estimation                       | 14        |
| <b>C Model Performance Summary</b>                        | <b>17</b> |
| <b>D More on Adaptive Prior Learning Model</b>            | <b>18</b> |
| D.1. More about Model Misspecification and Sampling Error | 18        |
| D.2. Empirical Justification of APL model                 | 18        |
| <b>E Experiment Details</b>                               | <b>19</b> |
| E.1. Classifiers Details                                  | 19        |
| E.2. Label Shift Estimation Models Details                | 20        |
| E.3. Experiment Setup Details                             | 21        |
| <b>F. CIFAR100 and CIFAR100-LT dataset results</b>        | <b>22</b> |
| F.1. Ordered Long-Tailed test set                         | 22        |
| F.2. Shuffled Long-Tailed test set                        | 26        |
| F.3. Dirichlet Shifted test set                           | 27        |
| <b>G ImageNet and ImageNet-LT dataset results</b>         | <b>29</b> |
| G.1. Ordered Long-Tailed test set                         | 29        |
| G.2. Shuffled Long-Tailed test set                        | 31        |
| G.3. Dirichlet Shifted test set                           | 32        |
| <b>H Places and Places-LT dataset results</b>             | <b>33</b> |
| H.1. Ordered Long-Tailed test set                         | 33        |
| H.2. Shuffled Long-Tailed test set                        | 35        |
| H.3. Dirichlet Shifted test set                           | 36        |

## A. More Discussions on EM

### A.1. EM Basics

The Expectation–Maximization (EM) algorithm is an iterative method used to find MLE or MAP estimates  $\pi^*$  of parameters  $\pi$ . That is

$$\pi^* = \arg \max_{\pi} L(\pi; X),$$

where  $L(\pi; X)$  is a log posterior of  $\pi$  given  $X$  or a log-likelihood of  $X$  given  $\pi$ . The algorithm works when the statistical model has unobserved latent variables  $Y$ .

An EM algorithm consists of two steps in every iteration, namely the **Expectation-Step** and **Maximization-Step**, which are usually referred as the **E-Step** and **M-Step** respectively. To derive an EM algorithm that maximizes  $L(\pi; X)$ , we first write the analytical expression of the log posterior or log likelihood of parameter  $\pi$  given observed variable  $X$  and unobserved latent variable  $Z$  as  $L(\pi; X, Y)$ .

In the **E-Step**, the model constructs a  $Q(\pi|\pi^{(t)})$  as the expectation of  $L(\pi; X, Y)$  w.r.t latent variable  $Y$  given observed variable  $X$  and current  $\pi^{(t)}$ :

$$Q(\pi|\pi^{(t)}) = \mathbb{E}_{Y|X, \pi^{(t)}} [L(\pi; X, Y)]. \quad (21)$$

In the **M-Step**, find the optimal  $\pi^{(t+1)}$  with:

$$\pi^{(t+1)} = \arg \max_{\pi} Q(\pi|\pi^{(t)}). \quad (22)$$

By repeating the two steps until convergence, under mild conditions, the algorithm is guaranteed to converge to a stationary point of  $L(\pi; X)$ . We recommend [this lecture note](#) for more detailed proof and discussion.

### A.2. EM Advantages

Some advantages of the EM algorithm are:

- The latent variable may be difficult to integrate out. The EM-algorithm allows one to manipulate conditional distributions by marginalising out a certain log likelihood with respect to the probability measure of a latent variable conditioned on data and parameters, which is often easier than integrating the latent variable directly.
- The **M-Step** often admits a closed form solution.
- It is guaranteed that  $L(\pi; X) - L(\pi^{(t)}; X) \geq Q(\pi|\pi^{(t)}) - Q(\pi^{(t)}|\pi^{(t)})$ , which means improvement in  $L(\pi; X)$  won't be less than improvement in  $Q(\pi|\pi^{(t)})$  by solve for best  $\pi^{(t+1)}$  in the  $t^{th}$  **M-Step**.

## B. Mathematical Proofs

### B.1. Proof of Convexity of MAP objective

*Proof.* We assume the parameter  $\boldsymbol{\pi}$  of target label distribution  $\mathbb{P}(Y_t = i|\boldsymbol{\pi}) = \pi_j$  follows a prior distribution  $\boldsymbol{\pi} \sim \text{Dir}(K, \boldsymbol{\alpha})$ , which is a Dirichlet distribution.  $\boldsymbol{\alpha} = [\alpha_1, \alpha_2, \dots, \alpha_K]$  is the parameter of the prior. For unlabelled sample  $\mathbb{X} = \{x_i | i = 1, 2, \dots, N\}$  drawn i.i.d from target distribution  $P_t$ , we want to find parameter  $\boldsymbol{\pi} \in \Delta^{K-1}$  that maximizes the posterior  $\mathbb{P}(\boldsymbol{\pi}|\mathbb{X}, \boldsymbol{\alpha})$ , or equivalently minimizes the negative log posterior:

$$\boldsymbol{\pi}^* = \arg \min_{\boldsymbol{\pi} \in \Delta^{K-1}} -\log \mathbb{P}(\boldsymbol{\pi}|\mathbb{X}, \boldsymbol{\alpha}) = \arg \min_{\boldsymbol{\pi} \in \Delta^{K-1}} - \left( \log \prod_{i=1}^N \mathbb{P}(X_t = x_i|\boldsymbol{\pi}) + \log \mathbb{P}(\boldsymbol{\pi}|\boldsymbol{\alpha}) + \text{Const} \right) \quad (23)$$

where *Const* includes all terms that can be treated as a constant w.r.t  $\boldsymbol{\pi}$ .  $\mathbb{P}(\boldsymbol{\pi}|\boldsymbol{\alpha})$  is the Dirichlet prior, with  $\log \mathbb{P}(\boldsymbol{\pi}|\boldsymbol{\alpha})$  as a concave function of  $\boldsymbol{\pi}$ :

$$\log \mathbb{P}(\boldsymbol{\pi}|\boldsymbol{\alpha}) = \log \frac{1}{\mathbf{B}(\boldsymbol{\alpha})} \prod_{i=1}^K \pi_i^{\alpha_i-1} = \sum_{i=1}^K (\alpha_i - 1) \log \pi_i + \text{Const} \quad (24)$$

with  $\mathbf{B}(\boldsymbol{\alpha})$  as the normalization constant for a given  $\boldsymbol{\alpha}$ . Here we require  $\alpha_i - 1 > 0, i = 1, 2, \dots, K$ .

Suppose the equality in (25) below holds for the source label distribution  $\mathbb{P}(Y_s = j)$ , classifier  $f$  and target label distribution  $\mathbb{P}(Y_t = j|\boldsymbol{\pi})$ :

$$\begin{aligned} \mathbb{P}(Y_s = j) &= c_j > 0 \\ \mathbb{P}(Y_s = j|X_s = x) &= f(x)_j \\ \mathbb{P}(Y_t = j|\boldsymbol{\pi}) &= \pi_j \end{aligned} \quad (25)$$

Alexandari *et al.* [1] has proved that under label shift, if (25) holds for  $(x, i) \in \mathcal{X} \times \mathcal{Y}$ , then the negative log likelihood defined in (26) is convex.

$$-\log L(\boldsymbol{\pi}; \mathbb{X}) = -\log \mathbb{P}(\mathbb{X}|\boldsymbol{\pi}) = -\log \prod_{i=1}^N \mathbb{P}(X_t = x_i|\boldsymbol{\pi}) \quad (26)$$

Thus the MAP objective in (23) can be rewritten as:

$$\boldsymbol{\pi}^* = \arg \min_{\boldsymbol{\pi} \in \Delta^{K-1}} - \left( \log L(\boldsymbol{\pi}; \mathbb{X}) + \sum_{i=1}^K (\alpha_i - 1) \log \pi_i + \text{Const} \right). \quad (27)$$

The objective function in (27) is adding (26) with extra term  $\sum_{l=1}^K (\alpha_l - 1) \log \pi_l$ , which is a strictly convex function. Given the constraints  $\boldsymbol{\pi} \in \Delta^{K-1} \subseteq \mathbb{R}^K$  defines a convex set, the above optimization problem is a convex optimization problem with a unique global minima. ■

## B.2. Proof of EM for MAP estimation

*Proof.* We follow the standard EM derivation procedure. We first derive the form of complete posterior  $\mathbb{P}(\boldsymbol{\pi}|\mathbb{X}, \mathbb{Y}, \boldsymbol{\alpha})$  with unobserved latent variable  $\mathbb{Y}$  based on the original posterior  $\mathbb{P}(\boldsymbol{\pi}|\mathbb{X}, \boldsymbol{\alpha})$ . Based on same assumptions made by MLLS [1, 32], we construct analytical expression of  $Q(\boldsymbol{\pi}|\boldsymbol{\pi}^{(t)})$  function for E-Step in EM. Finally, we optimize  $Q(\boldsymbol{\pi}|\boldsymbol{\pi}^{(t)})$  w.r.t  $\boldsymbol{\pi}$  to find the M-Step.

The EM algorithm optimizes the original posterior  $\mathbb{P}(\boldsymbol{\pi}|\mathbb{X}, \boldsymbol{\alpha})$  with an iterative procedure. Target labels  $\mathbb{Y} = \{y_i | \{y_i, x_i\} \sim P_t, x_i \in \mathbb{X}\}$  of input image  $\mathbb{X}$  are treated as unobserved latent variables. The complete posterior  $\mathbb{P}(\boldsymbol{\pi}|\mathbb{X}, \mathbb{Y}, \boldsymbol{\alpha})$  that includes latent variable  $\mathbb{Y}$  can be written as:

$$\begin{aligned}
\mathbb{P}(\boldsymbol{\pi}|\mathbb{X}, \mathbb{Y}, \boldsymbol{\alpha}) &= \frac{\mathbb{P}(\boldsymbol{\pi}|\boldsymbol{\alpha})\mathbb{P}(\mathbb{X}, \mathbb{Y}|\boldsymbol{\pi})}{\int_{\boldsymbol{\pi}} \mathbb{P}(\boldsymbol{\pi}|\boldsymbol{\alpha})\mathbb{P}(\mathbb{X}, \mathbb{Y}|\boldsymbol{\pi})d\boldsymbol{\pi}} \\
&= \frac{1}{Z}\mathbb{P}(\boldsymbol{\pi}|\boldsymbol{\alpha}) \prod_{i=1}^N \mathbb{P}(X_t = x_i, Y_t = y_i|\boldsymbol{\pi}) \\
&= \frac{1}{Z}\mathbb{P}(\boldsymbol{\pi}|\boldsymbol{\alpha}) \prod_{i=1}^N \mathbb{P}(X_t = x_i|Y_t = y_i)\mathbb{P}(Y_t = y_i|\boldsymbol{\pi}) \\
&= \frac{1}{Z}\mathbb{P}(\boldsymbol{\pi}|\boldsymbol{\alpha}) \prod_{i=1}^N \mathbb{P}(X_s = x_i|Y_s = y_i)\mathbb{P}(Y_t = y_i|\boldsymbol{\pi}) \\
&= \frac{1}{Z}\mathbb{P}(\boldsymbol{\pi}|\boldsymbol{\alpha}) \prod_{i=1}^N \frac{\mathbb{P}(Y_t = y_i|\boldsymbol{\pi})}{\mathbb{P}(Y_s = y_i)} \mathbb{P}(Y_s = y_i|X_s = x_i)\mathbb{P}(X_s = x_i)
\end{aligned} \tag{28}$$

where  $Z$  is the integral in the denominator that has integrated out  $\boldsymbol{\pi}$  and can be treated as a constant w.r.t  $\boldsymbol{\pi}$ . Further,  $\mathbb{P}(\boldsymbol{\pi}|\boldsymbol{\alpha})$  is the Dirichlet prior of  $\boldsymbol{\pi}$  that has the expression:

$$\mathbb{P}(\boldsymbol{\pi}|\boldsymbol{\alpha}) = \frac{1}{\mathbf{B}(\boldsymbol{\alpha})} \prod_{i=1}^K \pi_i^{\alpha_i-1} \tag{29}$$

with  $\mathbf{B}(\boldsymbol{\alpha})$  as the normalization constant for a given  $\boldsymbol{\alpha}$  and  $\alpha_i - 1 > 0, i = 1, 2 \dots K$ .

In the **E-Step**, given  $\boldsymbol{\pi}^{(t)}$  in the  $t^{\text{th}}$  iteration, with the complete posterior  $\mathbb{P}(\boldsymbol{\pi}|\mathbb{X}, \mathbb{Y}, \boldsymbol{\alpha})$ , the  $Q(\boldsymbol{\pi}|\boldsymbol{\pi}^{(t)})$  can be written as:

$$\begin{aligned}
Q(\boldsymbol{\pi}|\boldsymbol{\pi}^{(t)}) &= \mathbb{E}_{\mathbb{Y}|\mathbb{X}, \boldsymbol{\pi}^{(t)}} [\log \mathbb{P}(\boldsymbol{\pi}|\mathbb{X}, \mathbb{Y}, \boldsymbol{\alpha})] \\
&= \mathbb{E}_{\mathbb{Y}|\mathbb{X}, \boldsymbol{\pi}^{(t)}} \left[ \log \left( \mathbb{P}(\boldsymbol{\pi}|\boldsymbol{\alpha}) \prod_{i=1}^N \frac{\mathbb{P}(Y_t = y_i|\boldsymbol{\pi})}{\mathbb{P}(Y_s = y_i)} \mathbb{P}(Y_s = y_i|X_s = x_i)\mathbb{P}(X_s = x_i) \right) + Const \right] \\
&= \mathbb{E}_{\mathbb{Y}|\mathbb{X}, \boldsymbol{\pi}^{(t)}} \left[ \sum_{i=1}^N \log \prod_{j=1}^K \pi_j^{\mathbb{I}(y_i=j)} \right] + \sum_{l=1}^K (\alpha_l - 1) \log \pi_l + Const \\
&= \sum_{i=1}^N \sum_{j=1}^K \mathbb{E}_{\mathbb{Y}|\mathbb{X}, \boldsymbol{\pi}^{(t)}} [\mathbb{I}(y_i = j)] \log \pi_j + \sum_{l=1}^K (\alpha_l - 1) \log \pi_l + Const \\
&= \sum_{j=1}^K \sum_{i=1}^N \mathbb{P}(Y_t = j|X_t = x_i, \boldsymbol{\pi}^{(t)}) \log \pi_j + \sum_{l=1}^K (\alpha_l - 1) \log \pi_l + Const
\end{aligned} \tag{30}$$

where  $\mathbb{I}(y_i = j)$  is the indicator function. In the above derivation, all terms that are irrelevant to  $\boldsymbol{\pi}$  are moved in the term  $Const$ . For example,  $\mathbb{E}_{\mathbb{Y}|\mathbb{X}, \boldsymbol{\pi}^{(t)}} [\mathbb{P}(Y_s = y_i)]$  and  $\log \mathbf{B}(\boldsymbol{\alpha})$ .

Note that in label shift, Saren *et al.* [32] proved that under label shift (1),  $\mathbb{P}(Y_t = j|X_t = x_i, \boldsymbol{\pi})$  can be written as:

$$\mathbb{P}(Y_t = y_i|X_t = x_i, \boldsymbol{\pi}) = \frac{\frac{\mathbb{P}(Y_t=y_i|\boldsymbol{\pi})}{\mathbb{P}(Y_s=y_i)} \mathbb{P}(Y_s = y_i|X_s = x_i)}{\sum_{l=1}^K \frac{\mathbb{P}(Y_t=l|\boldsymbol{\pi})}{\mathbb{P}(Y_s=l)} \mathbb{P}(Y_s = l|X_s = x_i)} \tag{31}$$

We can substitute analytical expression of each probability into the equation with (25):

$$g(x_i, \boldsymbol{\pi})_j := \mathbb{P}(Y_t = j | X_t = x_i, \boldsymbol{\pi}) = \frac{\frac{\pi_j}{c_j} f(x_i)_j}{\sum_{l=1}^K \frac{\pi_l}{c_l} f(x_i)_l} \quad (32)$$

Then the  $Q(\boldsymbol{\pi} | \boldsymbol{\pi}^{(t)})$  can be rewritten as:

$$Q(\boldsymbol{\pi} | \boldsymbol{\pi}^{(t)}) = \sum_{j=1}^K \sum_{i=1}^N g(x_i; \boldsymbol{\pi}^{(t)})_j \log \pi_j + \sum_{l=1}^K (\alpha_l - 1) \log \pi_l + Const \quad (33)$$

In the **M-step**, we solve the optimization objective with respect to  $\boldsymbol{\pi}$ :

$$\boldsymbol{\pi}^{(t+1)} = \arg \max_{\boldsymbol{\pi} \in \Delta^{K-1}} Q(\boldsymbol{\pi} | \boldsymbol{\pi}^{(t)}) \quad (34)$$

By substitution, the objective can be rewritten as:

$$\begin{cases} \min_{\boldsymbol{\pi}} - \sum_{i=1}^N \sum_{j=1}^K g(x_i; \boldsymbol{\pi}^{(t)})_j \log \pi_j - \sum_{l=1}^K (\alpha_l - 1) \log \pi_l \\ \text{s.t: } \sum_{j=1}^K \pi_j = 1 \text{ and } \pi_i \geq 0, i \in [1, 2, \dots, K] \end{cases} \quad (35)$$

**Convexity** The objective we want to optimize is just a linear combination of  $\log \pi_i$ , which is a concave function w.r.t  $\boldsymbol{\pi}$ . Knowing that the constraints define a convex set on  $\mathbb{R}^K$ , the above optimization problem is also a convex optimization problem and every local minima is a global minima.

**Optimization without inequality constraints** With only equality constraints, standard Lagrangian Multiplier method can be applied. The Lagrangian can be written as:

$$\mathcal{L}(\boldsymbol{\pi}, \lambda) = \sum_{i=1}^N \sum_{j=1}^K g(x_i; \boldsymbol{\pi}^{(t)})_j \log \pi_j + \sum_{j=1}^K (\alpha_j - 1) \log \pi_j + \lambda(1 - \sum_{j=1}^K \pi_j) \quad (36)$$

The optimal  $\boldsymbol{\pi}$  can be found by taking all the partial derivative of  $\mathcal{L}(\boldsymbol{\pi}, \lambda)$  w.r.t  $\pi_j$  and  $\lambda$  to 0:

$$\begin{cases} \frac{\partial \mathcal{L}}{\partial \pi_j} = \frac{\sum_{i=1}^N g(x_i; \boldsymbol{\pi}^{(t)})_j}{\pi_j} + \frac{\alpha_j - 1}{\pi_j} - \lambda = 0 \\ \frac{\partial \mathcal{L}}{\partial \lambda} = \sum_{i=1}^K \pi_i - 1 = 0 \end{cases} \quad (37)$$

The solution to the above equation set can be written as:

$$\begin{cases} \pi_j = \frac{\sum_{i=1}^N g(x_i; \boldsymbol{\pi}^{(t)})_j + \alpha_j - 1}{\lambda} \\ \lambda = N + \sum_{l=1}^K (\alpha_l - 1) \end{cases} \quad (38)$$

Therefore optimal  $\boldsymbol{\pi}$  for  $Q(\boldsymbol{\pi} | \boldsymbol{\pi}^{(t)})$  without inequality constraints is given by:

$$\pi_j = \frac{\sum_{i=1}^N g(x_i; \boldsymbol{\pi}^{(t)})_j + \alpha_j - 1}{N + \sum_{l=1}^K (\alpha_l - 1)} \quad (39)$$

**Proof that the solution satisfies inequality constraints** In the expression of  $g(x_i; \boldsymbol{\pi}^{(t)})_j$  defined in 32, the output of the classifier  $f : \mathcal{X} \rightarrow \Delta^{K-1}$  is a probability simplex and thus is non-negative. Note that we also have  $c_i > 0, i = 1, 2, \dots, K$ . Therefore  $\boldsymbol{\pi}^{(t)} > 0 \Rightarrow g(x_i; \boldsymbol{\pi}^{(t)})_j > 0$  is non-negative. Note that we also require  $\alpha_i - 1 > 0, i = 1, 2, \dots, K$  when defining the Dirichlet prior. Therefore we have  $\boldsymbol{\pi}^{(t)} > 0 \Rightarrow \boldsymbol{\pi}^{(t+1)} > 0$ .

Because the optimization problem is convex, when  $\pi_j^{(t)} > 0, j = 1, 2, \dots, K$ , the above equation gives the global optimal  $\boldsymbol{\pi}^{(t+1)}$ :

$$\pi_j^{(t+1)} = \left( \arg \max_{\boldsymbol{\pi} \in \Delta^{K-1}} Q(\boldsymbol{\pi} | \boldsymbol{\pi}^{(t)}) \right)_j = \frac{\sum_{i=1}^N g(x_i; \boldsymbol{\pi}^{(t)})_j + \alpha_j - 1}{N + \sum_{l=1}^K (\alpha_l - 1)} \quad (40)$$

■

---

**Algorithm 3** MAPLS (Formal EM Formulation)

---

**Input:** Target domain unlabeled data  $\{x_i | i = 1, 2, \dots, N, \{x_i, \cdot\} \sim P_t\}$ , source domain label distribution  $P(Y_s = j) = c_j$  and blackbox classifier  $f : \mathcal{X} \rightarrow \Delta^{K-1}$ , Dirichlet prior  $\mathbb{P}(\boldsymbol{\pi} | \boldsymbol{\alpha})$ .

**Initialize:**  $\boldsymbol{\pi}^{(0)} \in \Delta^{K-1}$  with  $\pi_i^{(0)} > 0, i = 1, 2, \dots, K$

**for**  $t = 0$  to  $T$  **do**

    Estimating latent conditional distribution  $g(x_i; \boldsymbol{\pi}^{(t)})_j := \mathbb{P}(Y_t = j | X_t = x_i, \boldsymbol{\pi}^{(t)})$ :

$$g(x_i; \boldsymbol{\pi}^{(t)})_j = \frac{\frac{\pi_j^{(t)}}{c_j} f(x_i)_j}{\sum_{l=1}^K \frac{\pi_l^{(t)}}{c_l} f(x_i)_l} \quad (41)$$

**E-step** Construct  $Q(\boldsymbol{\pi} | \boldsymbol{\pi}^{(t)})$  as:

$$\begin{aligned} Q(\boldsymbol{\pi} | \boldsymbol{\pi}^{(t)}) &= \mathbb{E}_{\mathbb{Y} | \mathbb{X}, \boldsymbol{\pi}^{(t)}} [\log \mathbb{P}(\boldsymbol{\pi} | \mathbb{X}, \mathbb{Y}, \boldsymbol{\alpha})] \\ &= \sum_{i=1}^N \sum_{j=1}^K g(x_i; \boldsymbol{\pi}^{(t)})_j \log \pi_j + \sum_{l=1}^K (\alpha_l - 1) \log \pi_l + Const \end{aligned} \quad (42)$$

**M-step** Maximize  $Q(\boldsymbol{\pi} | \boldsymbol{\pi}^{(t)})$  w.r.t  $\boldsymbol{\pi} \in \Delta^{K-1}$ :

$$\pi_j^{(t+1)} = \left( \arg \max_{\boldsymbol{\pi} \in \Delta^{K-1}} Q(\boldsymbol{\pi} | \boldsymbol{\pi}^{(t)}) \right)_j = \frac{\sum_{i=1}^N g(x_i; \boldsymbol{\pi}^{(t)})_j + \alpha_j - 1}{N + \sum_{l=1}^K (\alpha_l - 1)} \quad (43)$$

**end for**

**Output:**  $\mathbb{P}(Y_t = \cdot) = \boldsymbol{\pi}^{(T+1)}$

---

### C. Model Performance Summary

**Label Shift Estimation Error:** The experimental result demonstrates that, in terms of label shift estimation error, our MAPLS-APL model generally outperform previous models on large scale datasets. As shown in Tab. 7, in terms of label shift estimation error, for each train-test label shift setting, our model outperform other models at least half of the time.

| Train Set \ Test Set | Ordered LT        | Shuffled LT   | Dirichlet     |
|----------------------|-------------------|---------------|---------------|
| CIFAR100/CIFAR100-LT | 55% (Tab. 15, 17) | 50% (Tab. 19) | 52% (Tab. 21) |
| ImageNet/ImageNet-LT | 82% (Tab. 23, 25) | 90% (Tab. 27) | 75% (Tab. 29) |
| Places/Places-LT     | 68% (Tab. 31, 33) | 90% (Tab. 35) | 92% (Tab. 37) |

Table 7. **Label Shift Estimation performance summary.** The percentage of settings that our MAPLS-APL model outperform other label shift estimation models in terms of  $(w - \hat{w})^2 / K$  and the reference to original results.

Our MAPLS-APL model tends to outperform other model when source and target domain have highly imbalance label distribution.

**Top1 Accuracy:** Label shift estimation models generally do not compare their performance in terms of Top1 Accuracy [1, 2, 10, 22]. In this work, we provide this metric to analyze if a label shift estimation model can be used to generally improve the accuracy of a classifier under label shift.

| Train Set \ Test Set | Ordered LT        | Shuffled LT   | Dirichlet     |
|----------------------|-------------------|---------------|---------------|
| CIFAR100/CIFAR100-LT | 56% (Tab. 16, 18) | 58% (Tab. 20) | 58% (Tab. 22) |
| ImageNet/ImageNet-LT | 59% (Tab. 24, 26) | 80% (Tab. 28) | 58% (Tab. 30) |
| Places/Places-LT     | 59% (Tab. 32, 34) | 80% (Tab. 36) | 75% (Tab. 38) |

Table 8. **Label Shift Estimation and Correction Top1 Acc summary.** The percentage of settings that our MAPLS-APL model outperform other label shift estimation models and the baseline in terms of Top1 Accuracy and the reference to the original results.

**Training time:** We also analyze the average training time of each label shift estimation models on different datasets. Results are provided in Tab. 9. Our MAPLS-APL model have comparable training time with SOTA models. Our PSLs-APL model utilize the entire posterior at the cost of longer training time.

| Model            | CIFAR100 | ImageNet | Places |
|------------------|----------|----------|--------|
| MLLS             | < 1      | ~ 20     | ~ 10   |
| BBSE             | < 1      | ~ 10     | ~ 2    |
| RLLS             | < 1      | ~ 200    | ~ 20   |
| MAPLS-APL (ours) | < 1      | ~ 25     | ~ 10   |
| PSLS-APL (ours)  | ~ 100    | ~ 1000   | ~ 200  |

Table 9. **Average training time comparison (seconds).** Training time of SOTA models and our MAPLS-APL/PSLS-APL models on different dataset on a single NVIDIA RTX 2080Ti GPU. Our PSLs-APL model trade longer training time for entire posterior information.

**Remark on PSLs-APL model** Unlike SOTA models and our MAPLS-APL model that provide point estimate of  $\pi$ , our posterior sampling method PSLs-APL obtain i.i.d samples from the posterior  $\mathbb{P}(\pi | \mathbb{X}, \alpha)$ . Thus PSLs-APL is not feasible to compare Top1 Accuracy with other models in Tab. 6.

## D. More on Adaptive Prior Learning Model

### D.1. More about Model Misspecification and Sampling Error

The left figure in Fig. 2 demonstrates how model misspecification can influence the performance of label shift estimation models. The results are obtained on the CIFAR100-100-LT dataset, with different classifiers  $f$  (trained on different CIFAR100-LT datasets) and fixed source label distribution  $\mathbb{P}(Y_s = \cdot)$  and target label distribution  $\mathbb{P}(Y_t = \cdot)$ .

The right figure in Fig. 2 demonstrates that the relative sampling error of a label shift estimation model can be amplified when there is a large label shift between source and target label distribution. The results are obtained on the ImageNet-LT dataset, with different target label distributions  $\mathbb{P}(Y_t = \cdot)$  (different Ordered LT target domain shift) and fixed source label distribution  $\mathbb{P}(Y_s = \cdot)$  and classifier  $f$ .

### D.2. Empirical Justification of APL model

With empirical evidence, we show that the best choice of the parameter for the Dirichlet prior  $\alpha$  or parameter  $\lambda = N/(N + K(\alpha_0 - 1))$  in our MAPLS model is different with different source and target label distribution settings. Further, our proposed Adaptive Prior Learning model can give a good choice of  $\lambda$ .

We compared the performance of the MAPLS-APL model with MAPLS models that have fixed  $\lambda$ . The experiment is carried out on the ImageNet-LT dataset with a uniform test set. As shown in Eq. (12), our MAPLS model degenerates to MLLS in the  $\lambda = 1$  setting. As can be seen from Tab. 10, the best choice of  $\lambda$  varies with different target label distribution. MLLS generally performs worse than every MAPLS model. Our heuristic can give the  $\lambda$  that is close to the best choice.

| Order                          | Forward        |                |                |                |               | Uniform       | Backward      |               |                |                |                |
|--------------------------------|----------------|----------------|----------------|----------------|---------------|---------------|---------------|---------------|----------------|----------------|----------------|
| Imbalance Ratio                | 50             | 25             | 10             | 5              | 2             | 1             | 2             | 5             | 10             | 25             | 50             |
| MLLS-soft                      | 48.6621        | 42.5194        | 40.3712        | 58.1909        | 73.8265       | 83.7752       | 86.1056       | 161.6308      | 163.4361       | 252.6892       | 291.1914       |
| MAPLS-soft ( $\lambda = 0.9$ ) | <b>12.9288</b> | <b>12.3030</b> | 13.2342        | 15.0942        | 14.6698       | 18.6681       | 20.2939       | 45.5180       | 52.1702        | 98.6632        | 133.5647       |
| MAPLS-soft ( $\lambda = 0.7$ ) | 15.8842        | 14.6270        | <b>12.7211</b> | <b>10.3413</b> | 6.1992        | 4.6816        | 4.4100        | 12.4146       | 22.5194        | <b>51.8191</b> | <b>82.3434</b> |
| MAPLS-soft ( $\lambda = 0.5$ ) | 20.8323        | 18.7681        | 15.2712        | 11.3622        | <b>5.5232</b> | 2.4841        | 1.7870        | 8.8930        | <b>21.6946</b> | 52.7513        | 86.8700        |
| MAPLS-soft ( $\lambda = 0.3$ ) | 24.9417        | 22.2047        | 17.5530        | 12.6299        | 5.6351        | 1.9094        | 1.1774        | <b>9.1997</b> | 24.3382        | 59.6757        | 98.3755        |
| MAPLS-soft ( $\lambda = 0.1$ ) | 28.1548        | 24.9087        | 19.4085        | 13.7481        | 5.9058        | <b>1.7629</b> | <b>1.1065</b> | 10.2160       | 27.2829        | 66.6140        | 109.3945       |
| MAPLS-APL-soft ( <b>ours</b> ) | 13.8236        | 13.3801        | 12.5594        | 10.3940        | 5.8088        | 3.5968        | 3.6781        | 13.4849       | 24.4035        | 57.7872        | 90.3704        |

Table 10. Performance of  $(w - \hat{w})^2/K$  on ImageNet-LT dataset, with Ordered Long-Tailed test set that have imbalance ratio  $R = \{50, 10, 5, 2\}$  and forward and backward order. Best among fixed  $\lambda$  models are in bold face. Each reported values are averaging over 10 different shuffled and random sampled test set.



## E. Experiment Details

### E.1. Classifiers Details

We implement the Neural Network classifier models using PyTorch [27]. We train a ResNet32 [18] classifier for CIFAR100 and every CIFAR100-LT dataset with weight decay  $5e^{-4}$  for 200 epochs. The learning rate is initialized at 0.1 and drops by a factor of 10 at epochs 100 and 150. For ImageNet and Places, we use the pre-trained ResNet50 and ResNet152 respectively a classifier. For ImageNet-LT and Places-LT, we train a ResNet50 [14] classifier with weight decay  $2e^{-4}$  for 100 epochs. The learning rate is initialized to 0.1 and drops by a factor of 10 at epochs 60 and 80.

| Dataset              | Model     | Setup                   | lr    | weight decay | epoch | scheduler                  | mixup $\alpha$ |
|----------------------|-----------|-------------------------|-------|--------------|-------|----------------------------|----------------|
| CIFAR100/CIFAR100-LT | ResNet32  | Train from Scratch      | 0.1   | $5e^{-4}$    | 200   | lr decay 0.1 at [100, 150] | 0.2            |
| ImageNet             | ResNet50  | Pre-Trained on ImageNet | -     | -            | -     | -                          | -              |
| ImageNet-LT          | ResNet50  | Train from Scratch      | 0.1   | $2e^{-4}$    | 100   | lr decay 0.1 at [60, 80]   | 0.2            |
| Places               | ResNet152 | Pre-Trained on Places   | -     | -            | -     | -                          | -              |
| Places-LT            | ResNet152 | Pre-Trained on ImageNet | 0.001 | $1e^{-4}$    | 100   | lr decay 0.1 at [60, 80]   | 0.1            |

Table 11. Neural Network classifier setup used in our model.

For all the models training from scratch, we apply MixUp [41] with the parameter set to 0.2 during training. This is because MixUp is known to help increase Neural Network classifiers’ calibration performance [35] and MLLS works better when classifier is calibrated on the source domain [1, 10].

## E.2. Label Shift Estimation Models Details

We report the performance of previous methods based on the source code below. MLLS code is provided by Alexandari *et al.* [1] which have included the source code of RLLS [2] and BBSE [22] with their original github page provided in the Tab. 12. Only RLLS has hyperparameter in their model. We follow Alexandari *et al.* [1] and RLLS original implementation to set the hyperparameter to be  $\alpha = 0.01$ .

| Model Name   | Source Code                                                                                                         | Date of Retrieval |
|--------------|---------------------------------------------------------------------------------------------------------------------|-------------------|
| MLLS [1, 32] | <a href="https://github.com/kundajelab/labelshiftpperiments">https://github.com/kundajelab/labelshiftpperiments</a> | Aug 2022          |
|              | <a href="https://github.com/kundajelab/abstention">https://github.com/kundajelab/abstention</a>                     | Aug 2022          |
| BBSE [22]    | <a href="https://github.com/flaviovdv/label-shift">https://github.com/flaviovdv/label-shift</a>                     | Aug 2022          |
| RLLS [2]     | <a href="https://github.com/Angie-Liu/labelshift">https://github.com/Angie-Liu/labelshift</a>                       | Aug 2022          |

Table 12. Source Code details of reproduced existing label shift estimation models.

For MLLS and our proposed model, we follow MLLS [1] to initialize target label distribution the same as source domain label distribution  $\pi^{(0)} = \mathbf{c}$ . Each EM have  $T = 100$  iteration to get the final estimation. As shown in Fig. 6, MLLS and our MAPLS-APL algorithm have converged after 100 iteration.

Note that confusion matrix based method like BBSE requires a validation set from source domain  $P_s$  to construct  $K \times K$  confusion matrix. However, this is not feasible for dataset with target  $K$ . For ImageNet, this means estimating  $1000 \times 1000 = 1e^6$  elements in confusion matrix with only  $5e^4$  validation samples. Therefore in our experiments, we use train set data to estimating the  $K \times K$  confusion matrix. In ImageNet case, the  $1e^6$  element in confusion matrix is then estimated with  $1.28e^6$  samples rather than just  $5e^4$  samples. This approach may introduce extra error, but is more feasible in practice [22].

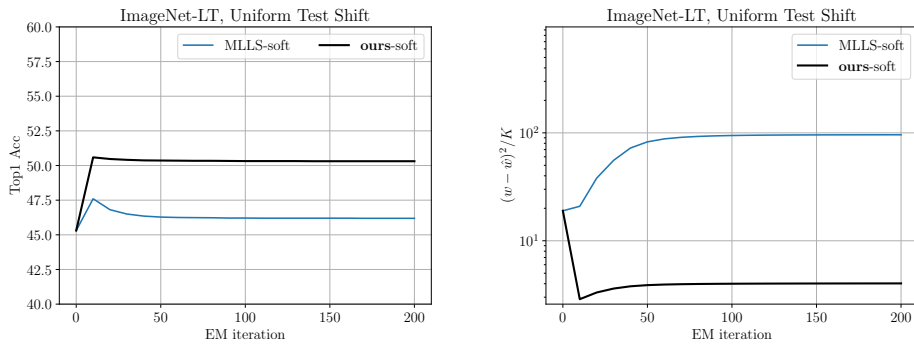

Figure 6. Performance of EM algorithm MLLS-soft and our MAPLS-APL-soft with different number of EM iterations, on ImageNet-LT dataset with uniform test set. Each algorithm have converged after 100 iteration.

### E.3. Experiment Setup Details

**Label Shift Estimation Error:** For label shift estimation error  $(w - \hat{w})^2/K$ , BBSE and RLLS are able to directly output  $\hat{w}$  as a prediction to ground truth  $w = \mathbb{P}(Y_t = \cdot)/\mathbb{P}(Y_s = \cdot)$ . Therefore their performance can be computed directly. MLLS and our MAPLS/MAPLS-APL model predicts ground truth  $\pi$  with  $\hat{\pi}$ . Thus we follow MLLS to compute  $\hat{w} = \hat{\pi}/\mathbf{c}$ , where  $\mathbf{c}$  is the source label distribution estimated by MLE given source domain labelled data.

**Top1 Accuracy:** The Top1 Accuracy of each label shift estimation model is obtained by first estimating the label shift with corresponding model, then correct label shift on target domain for classifier  $f$ , with offline label shift correction method defined in Eq. (5). We also report Top1 Accuracy on baseline classifier without any label shift correction.

**Train and Test Sets:** We test our MAPLS/MAPLS-APL model with as many different label shift settings as we can. Our experiments includes all the train-test set combinations of a train set in Tab. 13 and a test set in Tab. 14.

| Dataset       | Setup       | Imbalance Ratio | Data Size | # of Classes | Top class sample | Tail class sample |
|---------------|-------------|-----------------|-----------|--------------|------------------|-------------------|
| CIFAR100 [21] | Original    | None            | 50k       | 100          | 500              | 500               |
|               | Long-tailed | 2               | 36.0k     | 100          | 500              | 250               |
|               | Long-tailed | 5               | 24.8k     | 100          | 500              | 100               |
|               | Long-tailed | 10              | 19.5k     | 100          | 500              | 50                |
|               | Long-tailed | 20              | 15.9k     | 100          | 500              | 25                |
|               | Long-tailed | 50              | 12.6k     | 100          | 500              | 10                |
|               | Long-tailed | 100             | 10.8k     | 100          | 500              | 5                 |
|               | Long-tailed | 200             | 9.5k      | 100          | 500              | 2                 |
| Places [44]   | Original    | None            | 1803.4k   | 365          | 5000             | 3068              |
|               | Long-tailed | 996             | 62.5k     | 365          | 4980             | 5                 |
| ImageNet [31] | Original    | None            | 1281.1k   | 1000         | 1300             | 732               |
|               | Long-tailed | 256             | 115.8k    | 1000         | 1280             | 5                 |

Table 13. Detailed information of train sets with different label shift in our paper.

| Target Shift           | Parameters                                             |
|------------------------|--------------------------------------------------------|
| Original (Uniform)     | None                                                   |
| Ordered Long-Tail [16] | $R = \{2, 5, 10, 50\}$ , Order = “Forward”, “Backward” |
| Shuffled Long-Tail     | $R = \{2, 5, 10, 50\}$                                 |
| Dirichlet [22]         | $\alpha = 1.0, 10$                                     |

Table 14. Detailed information of test sets with different label shift in our paper.

## F. CIFAR100 and CIFAR100-LT dataset results

### F.1. Ordered Long-Tailed test set

| CIFAR100              |               |               |               |               |               |               |               |               |               |               |               |
|-----------------------|---------------|---------------|---------------|---------------|---------------|---------------|---------------|---------------|---------------|---------------|---------------|
| Order                 | Forward       |               |               |               |               | Uniform       | Backward      |               |               |               |               |
| Imbalance Ratio       | 50            | 25            | 10            | 5             | 2             | 1             | 2             | 5             | 10            | 25            | 50            |
| MLLS-hard             | 0.1112        | 0.1088        | 0.0785        | 0.0703        | 0.0534        | 0.0443        | 0.0433        | 0.0462        | 0.0483        | 0.0543        | 0.0577        |
| MLLS-soft             | <b>0.0519</b> | <b>0.0534</b> | <b>0.0368</b> | 0.0325        | 0.0256        | 0.0199        | 0.0224        | 0.0303        | <b>0.0317</b> | <b>0.0398</b> | <b>0.0436</b> |
| BBSE-hard             | 0.1871        | 0.1388        | 0.0776        | 0.0416        | 0.0154        | 0.0089        | 0.0184        | 0.0482        | 0.0855        | 0.1411        | 0.1892        |
| BBSE-soft             | 0.0984        | 0.0766        | 0.0453        | 0.0285        | <b>0.0142</b> | 0.0102        | <b>0.0153</b> | 0.0325        | 0.0494        | 0.0771        | 0.1017        |
| RLLS-hard             | 1.0940        | 0.7798        | 0.4255        | 0.2150        | 0.0411        | 0.0000        | 0.0411        | 0.2150        | 0.4255        | 0.7798        | 1.0940        |
| RLLS-soft             | 1.0939        | 0.7798        | 0.4255        | 0.2150        | 0.0411        | <b>0.0000</b> | 0.0411        | 0.2150        | 0.4255        | 0.7798        | 1.0939        |
| MAPLS-APL-hard (Ours) | 0.1149        | 0.1003        | 0.0662        | 0.0520        | 0.0349        | 0.0286        | 0.0305        | 0.0403        | 0.0505        | 0.0679        | 0.0799        |
| MAPLS-APL-soft (Ours) | 0.0738        | 0.0638        | 0.0385        | <b>0.0271</b> | 0.0164        | <b>0.0115</b> | 0.0155        | <b>0.0272</b> | 0.0352        | 0.0517        | 0.0633        |

  

| CIFAR100-2-LT         |               |               |               |               |               |               |               |               |               |               |               |
|-----------------------|---------------|---------------|---------------|---------------|---------------|---------------|---------------|---------------|---------------|---------------|---------------|
| Order                 | Forward       |               |               |               |               | Uniform       | Backward      |               |               |               |               |
| Imbalance Ratio       | 50            | 25            | 10            | 5             | 2             | 1             | 2             | 5             | 10            | 25            | 50            |
| MLLS-hard             | 0.0584        | 0.0519        | 0.0576        | 0.0605        | 0.0585        | 0.0579        | 0.0654        | 0.0778        | 0.0842        | 0.0927        | 0.1166        |
| MLLS-soft             | <b>0.0462</b> | <b>0.0398</b> | <b>0.0377</b> | 0.0368        | 0.0323        | 0.0283        | 0.0343        | 0.0474        | 0.0599        | 0.0761        | 0.0881        |
| BBSE-hard             | 0.1477        | 0.1074        | 0.0703        | 0.0456        | 0.0197        | 0.0128        | 0.0217        | 0.0625        | 0.1075        | 0.2009        | 0.2638        |
| BBSE-soft             | 0.0727        | 0.0543        | 0.0379        | <b>0.0297</b> | 0.0187        | 0.0137        | 0.0179        | 0.0352        | 0.0521        | 0.0887        | 0.1107        |
| RLLS-hard             | 0.6031        | 0.4099        | 0.1908        | 0.0680        | 0.0000        | 0.0458        | 0.1946        | 0.5633        | 0.9705        | 1.6457        | 2.2487        |
| RLLS-soft             | 0.6031        | 0.4099        | 0.1908        | 0.0680        | <b>0.0000</b> | 0.0458        | 0.1946        | 0.5633        | 0.9705        | 1.6457        | 2.2487        |
| MAPLS-APL-hard (Ours) | 0.0737        | 0.0598        | 0.0508        | 0.0462        | 0.0322        | 0.0210        | 0.0356        | 0.0628        | 0.0818        | 0.1150        | 0.1567        |
| MAPLS-APL-soft (Ours) | 0.0822        | 0.0674        | 0.0529        | 0.0455        | 0.0289        | <b>0.0086</b> | <b>0.0130</b> | <b>0.0274</b> | <b>0.0390</b> | <b>0.0627</b> | <b>0.0806</b> |

  

| CIFAR100-5-LT         |               |               |               |               |               |               |               |               |               |               |               |
|-----------------------|---------------|---------------|---------------|---------------|---------------|---------------|---------------|---------------|---------------|---------------|---------------|
| Order                 | Forward       |               |               |               |               | Uniform       | Backward      |               |               |               |               |
| Imbalance Ratio       | 50            | 25            | 10            | 5             | 2             | 1             | 2             | 5             | 10            | 25            | 50            |
| MLLS-hard             | 0.0816        | 0.0793        | 0.1073        | 0.1216        | 0.1561        | 0.1853        | 0.2457        | 0.3504        | 0.4258        | 0.5287        | 0.6359        |
| MLLS-soft             | <b>0.0775</b> | <b>0.0748</b> | 0.0804        | 0.0995        | 0.0826        | 0.0942        | 0.1211        | 0.1862        | 0.1767        | <b>0.3124</b> | 0.3744        |
| BBSE-hard             | 0.1881        | 0.1816        | 0.1164        | 0.0984        | 0.0718        | 0.0377        | 0.0671        | 0.1560        | 0.2621        | 0.6362        | 0.7353        |
| BBSE-soft             | 0.0841        | 0.0713        | <b>0.0570</b> | 0.0537        | <b>0.0356</b> | 0.0408        | 0.0574        | 0.1261        | 0.1708        | 0.3669        | 0.4281        |
| RLLS-hard             | 0.3220        | 0.1866        | 0.0447        | <b>0.0001</b> | 0.1076        | 0.3862        | 0.8978        | 1.9947        | 3.1599        | 5.0756        | 6.7923        |
| RLLS-soft             | 0.3220        | 0.1866        | 0.0447        | 0.0001        | 0.1076        | 0.3862        | 0.8977        | 1.9947        | 3.1598        | 5.0756        | 6.7922        |
| MAPLS-APL-hard (Ours) | 0.1204        | 0.1025        | 0.0950        | 0.0807        | 0.0481        | <b>0.0249</b> | 0.0919        | 0.2702        | 0.4217        | 0.6506        | 0.8226        |
| MAPLS-APL-soft (Ours) | 0.2004        | 0.1974        | 0.1847        | 0.2024        | 0.1415        | 0.0600        | <b>0.0351</b> | <b>0.0867</b> | <b>0.1390</b> | 0.3252        | <b>0.2978</b> |

  

| CIFAR100-10-LT        |               |               |               |               |               |               |               |               |               |               |               |
|-----------------------|---------------|---------------|---------------|---------------|---------------|---------------|---------------|---------------|---------------|---------------|---------------|
| Order                 | Forward       |               |               |               |               | Uniform       | Backward      |               |               |               |               |
| Imbalance Ratio       | 50            | 25            | 10            | 5             | 2             | 1             | 2             | 5             | 10            | 25            | 50            |
| MLLS-hard             | <b>0.0643</b> | <b>0.0814</b> | 0.1076        | 0.1646        | 0.2924        | 0.4731        | 0.7737        | 1.3339        | 1.8762        | 2.7663        | 3.4112        |
| MLLS-soft             | 0.2085        | 0.2307        | 0.3143        | 0.3183        | 0.3521        | 0.4380        | 0.3576        | 1.2786        | 0.9244        | 1.2372        | 2.6438        |
| BBSE-hard             | 0.3988        | 0.6186        | 0.6794        | 0.3136        | 1.0622        | 0.1699        | 0.2268        | 0.8856        | 0.8115        | 1.1396        | 1.7270        |
| BBSE-soft             | 0.1796        | 0.1941        | 0.1825        | 0.1526        | 0.2604        | 0.2252        | 0.2897        | 0.8663        | <b>0.7290</b> | <b>0.9373</b> | <b>1.5710</b> |
| RLLS-hard             | 0.2006        | 0.0829        | 0.0003        | 0.0693        | 0.5182        | 1.2920        | 2.5931        | 5.2848        | 8.1105        | 12.7453       | 16.9049       |
| RLLS-soft             | 0.2006        | 0.0829        | <b>0.0003</b> | 0.0693        | 0.5182        | 1.2920        | 2.5931        | 5.2848        | 8.1105        | 12.7452       | 16.9047       |
| MAPLS-APL-hard (Ours) | 0.1688        | 0.1465        | 0.1021        | <b>0.0666</b> | <b>0.0288</b> | <b>0.0478</b> | 0.3065        | 1.2248        | 2.2082        | 3.7278        | 4.8302        |
| MAPLS-APL-soft (Ours) | 0.6830        | 0.7482        | 0.9220        | 0.9069        | 0.7311        | 0.3466        | <b>0.1153</b> | <b>0.4548</b> | 0.8022        | 1.2851        | 2.1746        |

Table 15. Performance of label shift estimation error  $(w - \hat{w})^2/K$  on CIFAR100 and CIFAR100-LT dataset, with imbalance ratio  $R = \{2, 5, 10\}$ . Test set have ordered Long-Tailed shift. Each reported values are averaging over 20 different shuffled and random sampled test set.

| CIFAR100-20-LT        |                   |                   |                   |                   |                   |                   |                   |                   |                   |                   |                   |
|-----------------------|-------------------|-------------------|-------------------|-------------------|-------------------|-------------------|-------------------|-------------------|-------------------|-------------------|-------------------|
| Order                 | Forward           |                   |                   |                   |                   | Uniform           | Backward          |                   |                   |                   |                   |
| Imbalance Ratio       | 50                | 25                | 10                | 5                 | 2                 | 1                 | 2                 | 5                 | 10                | 25                | 50                |
| MLLS-hard             | <b>0.1587</b>     | 0.2265            | 0.3015            | 0.5228            | 0.9652            | 1.5080            | 2.3236            | 3.9671            | 5.5135            | 8.0038            | 10.2356           |
| MLLS-soft             | 0.6706            | 0.8996            | 1.2976            | 1.7197            | 2.0114            | 2.3082            | 3.8745            | 4.2966            | 3.3055            | 5.3265            | 9.4385            |
| BBSE-hard             | 1.2515            | 2.0845            | 5.0574            | 3.4216            | 1.3311            | 26.4551           | 3.6669            | 10.0455           | 3.4961            | 9.4552            | <b>5.4054</b>     |
| BBSE-soft             | 0.9353            | 0.8459            | 1.2806            | 1.2914            | 1.0199            | 1.6793            | 1.9814            | 3.4160            | 4.5680            | 7.5762            | 6.9400            |
| RLLS-hard             | 0.0997            | 0.0110            | 0.0807            | 0.4611            | 1.8463            | 3.9698            | 7.4201            | 14.4547           | 21.8131           | 33.8971           | 44.7735           |
| RLLS-soft             | 0.0997            | <b>0.0110</b>     | <b>0.0807</b>     | 0.4611            | 1.8463            | 3.9702            | 7.4202            | 14.4550           | 21.8130           | 33.8967           | 44.7730           |
| MAPLS-APL-hard (Ours) | 0.4939            | 0.4087            | 0.3151            | <b>0.2506</b>     | <b>0.1197</b>     | <b>0.1526</b>     | <b>0.7543</b>     | 3.0308            | 5.6868            | 9.9517            | 13.1944           |
| MAPLS-APL-soft (Ours) | 2.1248            | 2.5210            | 3.1323            | 3.3225            | 2.7560            | 1.3423            | 0.8613            | <b>1.0474</b>     | <b>1.5530</b>     | <b>3.2712</b>     | 6.3812            |
| CIFAR100-50-LT        |                   |                   |                   |                   |                   |                   |                   |                   |                   |                   |                   |
| Order                 | Forward           |                   |                   |                   |                   | Uniform           | Backward          |                   |                   |                   |                   |
| Imbalance Ratio       | 50                | 25                | 10                | 5                 | 2                 | 1                 | 2                 | 5                 | 10                | 25                | 50                |
| MLLS-hard             | 0.4564            | 0.7598            | 1.5995            | 2.9962            | 6.1775            | 10.6642           | 17.3656           | 30.3777           | 44.2637           | 66.0673           | 85.3506           |
| MLLS-soft             | 3.6399            | 4.6052            | 4.2592            | 5.2411            | 10.2603           | 10.5574           | 20.0799           | 38.2874           | 32.9386           | 75.1315           | 78.7784           |
| BBSE-hard             | 91.1766           | 5.7e <sup>6</sup> | 5.4e <sup>5</sup> | 407.9134          | 4.4e <sup>6</sup> | 2.0e <sup>7</sup> | 4.5e <sup>8</sup> | 1.0e <sup>7</sup> | 7.8e <sup>6</sup> | 6.7e <sup>3</sup> | 1.3e <sup>7</sup> |
| BBSE-soft             | 96.1977           | 38.2666           | 254.0946          | 5.8270            | 1.6e <sup>5</sup> | 306.8911          | 265.8220          | 880.7144          | 8.5e <sup>3</sup> | 2.3e <sup>4</sup> | 1.5e <sup>4</sup> |
| RLLS-hard             | <b>0.0054</b>     | <b>0.0925</b>     | 0.9226            | 2.7620            | 8.4237            | 16.6034           | 29.9977           | 56.5451           | 84.8068           | 131.7854          | 173.7755          |
| RLLS-soft             | 0.0054            | 0.0906            | <b>0.9193</b>     | 2.7622            | 8.4295            | 16.6977           | 29.9299           | 56.8225           | 85.0470           | 131.6754          | 173.7434          |
| MAPLS-APL-hard (Ours) | 1.5923            | 1.4350            | 1.0658            | <b>0.6335</b>     | <b>0.3920</b>     | <b>1.2321</b>     | <b>4.5314</b>     | 15.2032           | 29.4610           | 54.8555           | 78.7368           |
| MAPLS-APL-soft (Ours) | 14.4861           | 15.3854           | 16.4496           | 13.9173           | 16.4473           | 9.6150            | 4.9813            | <b>8.2935</b>     | <b>10.1994</b>    | <b>22.8203</b>    | <b>47.0972</b>    |
| CIFAR100-100-LT       |                   |                   |                   |                   |                   |                   |                   |                   |                   |                   |                   |
| Order                 | Forward           |                   |                   |                   |                   | Uniform           | Backward          |                   |                   |                   |                   |
| Imbalance Ratio       | 50                | 25                | 10                | 5                 | 2                 | 1                 | 2                 | 5                 | 10                | 25                | 50                |
| MLLS-hard             | 44.9205           | 38.0887           | 45.8544           | 42.3600           | 43.7414           | 47.8233           | 63.87             | 103.37            | 149.87            | 220.80            | 273.28            |
| MLLS-soft             | 3.0637            | 6.0161            | 10.0665           | 11.1877           | 28.0022           | 41.4067           | 54.1261           | 101.44            | 161.84            | 227.24            | 317.32            |
| BBSE-hard             | 2.3e <sup>4</sup> | 1.5e <sup>4</sup> | 3.1e <sup>3</sup> | 4.9e <sup>4</sup> | 9.7e <sup>7</sup> | 1.2e <sup>8</sup> | 3.9e <sup>5</sup> | 9.8e <sup>6</sup> | 1.5e <sup>5</sup> | 2.2e <sup>7</sup> | 2.4e <sup>6</sup> |
| BBSE-soft             | 153.7269          | 3.2e <sup>5</sup> | 8.5e <sup>3</sup> | 493.4652          | 7.2e <sup>4</sup> | 9.1e <sup>4</sup> | 1.2e <sup>5</sup> | 5.3e <sup>3</sup> | 4.3e <sup>4</sup> | 1.5e <sup>5</sup> | 2.4e <sup>4</sup> |
| RLLS-hard             | <b>0.0873</b>     | 0.7020            | <b>3.5932</b>     | <b>9.3034</b>     | 26.2131           | 50.6648           | 89.58             | 169.332           | 253.10            | 391.91            | 518.30            |
| RLLS-soft             | 0.0870            | <b>0.7008</b>     | 3.5943            | 9.3038            | 26.2526           | 50.6641           | 89.83             | 169.23            | 253.26            | 391.96            | 518.00            |
| MAPLS-APL-hard (Ours) | 20.0839           | 18.3336           | 14.7602           | 9.9220            | <b>2.8452</b>     | <b>0.8477</b>     | <b>6.75</b>       | <b>31.63</b>      | <b>65.97</b>      | <b>130.14</b>     | <b>191.80</b>     |
| MAPLS-APL-soft (Ours) | 18.2872           | 21.4946           | 18.0630           | 13.0629           | 4.3482            | 1.8832            | 7.50              | 35.66             | 68.15             | 138.09            | 218.09            |
| CIFAR100-200-LT       |                   |                   |                   |                   |                   |                   |                   |                   |                   |                   |                   |
| Order                 | Forward           |                   |                   |                   |                   | Uniform           | Backward          |                   |                   |                   |                   |
| Imbalance Ratio       | 50                | 25                | 10                | 5                 | 2                 | 1                 | 2                 | 5                 | 10                | 25                | 50                |
| MLLS-hard             | 39.4734           | 54.3263           | 119.9399          | 157.9984          | 271.7572          | 419.75            | 630.63            | 1012.82           | 1346.69           | 1931.56           | 2567.15           |
| MLLS-soft             | 10.7235           | 11.2820           | 47.2927           | 55.0693           | 131.0271          | 232.43            | 350.49            | 597.74            | 902.51            | 1386.22           | 1804.34           |
| BBSE-hard             | 3.2e <sup>5</sup> | 9.3e <sup>6</sup> | 6.5e <sup>6</sup> | 8.9e <sup>8</sup> | 6.8e <sup>4</sup> | 2.6e <sup>9</sup> | 6.5e <sup>6</sup> | 1.0e <sup>4</sup> | 2.6e <sup>4</sup> | 1.2e <sup>5</sup> | 1.9e <sup>5</sup> |
| BBSE-soft             | 1.4e <sup>5</sup> | 2.3e <sup>5</sup> | 2.3e <sup>4</sup> | 7.6e <sup>6</sup> | 772.48            | 1.3e <sup>5</sup> | 1.1e <sup>5</sup> | 8783.57           | 1.4e <sup>5</sup> | 1.0e <sup>4</sup> | 1.2e <sup>9</sup> |
| RLLS-hard             | <b>0.8851</b>     | <b>3.5660</b>     | <b>14.4068</b>    | 35.0877           | 97.2357           | 187.63            | 334.97            | 642.61            | 972.67            | 1532.69           | 2051.74           |
| RLLS-soft             | 0.8875            | 3.5685            | 14.4299           | 35.0986           | 97.2723           | 187.64            | 335.00            | 642.44            | 972.67            | 1532.79           | 2051.69           |
| MAPLS-APL-hard (Ours) | 50.3299           | 48.6633           | 40.0183           | <b>25.6926</b>    | 11.3733           | 21.34             | 72.55             | 233.90            | 440.66            | 839.90            | 1249.41           |
| MAPLS-APL-soft (Ours) | 70.7102           | 64.3605           | 56.5578           | 35.5457           | <b>7.3678</b>     | <b>8.33</b>       | <b>49.87</b>      | <b>198.37</b>     | <b>376.73</b>     | <b>742.34</b>     | <b>1128.60</b>    |

Table 16. Performance of label shift estimation error  $(w - \hat{w})^2 / K$  on CIFAR100-LT dataset, with imbalance ratio  $R = \{20, 50, 100, 200\}$ . Test set have ordered Long-Tailed shift. Each reported values are averaging over 20 different shuffled and random sampled test set.

| CIFAR100              |              |              |              |              |              |              |              |              |              |              |              |
|-----------------------|--------------|--------------|--------------|--------------|--------------|--------------|--------------|--------------|--------------|--------------|--------------|
| Order                 | Forward      |              |              |              |              | Uniform      | Backward     |              |              |              |              |
| Imbalance Ratio       | 50           | 25           | 10           | 5            | 2            | 1            | 2            | 5            | 10           | 25           | 50           |
| Baseline              | 69.05        | 69.01        | 69.81        | 69.88        | 70.28        | 70.53        | 70.75        | 71.00        | 70.95        | 70.96        | 71.28        |
| MLLS-hard             | 72.05        | 70.58        | 70.36        | 69.58        | 69.56        | 69.92        | 70.40        | 71.60        | 72.44        | 73.60        | 75.10        |
| MLLS-soft             | 72.59        | 70.91        | 70.79        | 69.93        | 69.75        | 70.14        | 70.67        | 71.79        | 72.70        | 73.95        | 75.21        |
| BBSE-hard             | 72.19        | 70.88        | 70.68        | <b>70.19</b> | <b>69.93</b> | 70.25        | 70.68        | 71.68        | 72.44        | 73.39        | 74.34        |
| BBSE-soft             | 72.55        | <b>71.19</b> | 70.84        | 70.12        | 69.90        | 70.24        | 70.75        | <b>71.90</b> | 72.66        | 73.78        | 74.82        |
| RLLS-hard             | 69.05        | 69.01        | 69.81        | 69.88        | 70.28        | 70.53        | 70.75        | 71.00        | 70.95        | 70.96        | 71.28        |
| RLLS-soft             | 69.05        | 69.01        | 69.81        | 69.88        | 70.28        | <b>70.53</b> | 70.75        | 71.00        | 70.95        | 70.96        | 71.28        |
| MAPLS-APL-hard (Ours) | 72.06        | 70.84        | 70.60        | 69.84        | 69.72        | 70.02        | 70.53        | 71.70        | 72.56        | 73.72        | 75.04        |
| MAPLS-APL-soft (Ours) | <b>72.62</b> | 71.17        | <b>70.94</b> | 70.07        | 69.89        | 70.28        | 70.75        | 71.89        | <b>72.81</b> | <b>74.00</b> | <b>75.25</b> |
| CIFAR100-2-LT         |              |              |              |              |              |              |              |              |              |              |              |
| Order                 | Forward      |              |              |              |              | Uniform      | Backward     |              |              |              |              |
| Imbalance Ratio       | 50           | 25           | 10           | 5            | 2            | 1            | 2            | 5            | 10           | 25           | 50           |
| Baseline              | 70.73        | 70.31        | 69.70        | 69.29        | 68.85        | 68.01        | 67.45        | 66.92        | 66.15        | 65.72        | 65.68        |
| MLLS-hard             | 73.38        | 71.58        | 69.56        | 68.63        | 67.93        | 67.35        | 67.31        | 68.18        | 68.69        | 70.33        | 72.02        |
| MLLS-soft             | <b>73.81</b> | <b>72.03</b> | 70.14        | 69.20        | 68.51        | 67.88        | 67.75        | 68.62        | 69.02        | 70.67        | 72.41        |
| BBSE-hard             | 72.86        | 71.62        | 70.02        | 69.29        | 68.66        | 68.07        | 68.06        | 68.74        | 69.09        | 70.19        | 71.83        |
| BBSE-soft             | 73.44        | 71.97        | 70.18        | 69.40        | 68.65        | 68.03        | 67.91        | 68.75        | 69.14        | 70.70        | 72.37        |
| RLLS-hard             | 70.73        | 70.31        | 69.70        | 69.29        | 68.85        | 68.01        | 67.45        | 66.92        | 66.15        | 65.72        | 65.68        |
| RLLS-soft             | 70.73        | 70.31        | 69.70        | 69.29        | <b>68.85</b> | 68.01        | 67.45        | 66.92        | 66.15        | 65.72        | 65.68        |
| MAPLS-APL-hard (Ours) | 73.37        | 71.71        | 69.87        | 68.96        | 68.31        | 67.88        | 67.65        | 68.54        | 68.87        | 70.62        | 72.21        |
| MAPLS-APL-soft (Ours) | 73.55        | 71.99        | <b>70.22</b> | <b>69.41</b> | 68.75        | <b>68.19</b> | <b>68.13</b> | <b>68.88</b> | <b>69.26</b> | <b>71.01</b> | <b>72.61</b> |
| CIFAR100-5-LT         |              |              |              |              |              |              |              |              |              |              |              |
| Order                 | Forward      |              |              |              |              | Uniform      | Backward     |              |              |              |              |
| Imbalance Ratio       | 50           | 25           | 10           | 5            | 2            | 1            | 2            | 5            | 10           | 25           | 50           |
| Baseline              | 70.64        | 69.75        | 68.03        | 66.62        | 64.37        | 62.59        | 60.80        | 58.25        | 56.74        | 55.04        | 53.10        |
| MLLS-hard             | 71.44        | 69.59        | 66.99        | 65.41        | 63.49        | 62.35        | 61.79        | 61.38        | 62.27        | 63.42        | 64.31        |
| MLLS-soft             | 71.75        | 69.85        | 67.43        | 66.01        | 64.21        | 63.42        | 62.81        | 62.63        | 63.58        | <b>64.76</b> | <b>65.56</b> |
| BBSE-hard             | 71.13        | 69.56        | 67.37        | 66.08        | 64.24        | 63.55        | 62.97        | 62.47        | 63.29        | 63.88        | 64.45        |
| BBSE-soft             | <b>71.77</b> | <b>70.09</b> | 67.68        | 66.27        | 64.37        | 63.46        | 62.86        | 62.55        | 63.39        | 64.57        | 64.84        |
| RLLS-hard             | 70.64        | 69.75        | 68.03        | 66.62        | 64.37        | 62.59        | 60.80        | 58.25        | 56.74        | 55.04        | 53.10        |
| RLLS-soft             | 70.64        | 69.75        | <b>68.03</b> | <b>66.62</b> | 64.37        | 62.59        | 60.80        | 58.25        | 56.74        | 55.04        | 53.10        |
| MAPLS-APL-hard (Ours) | 71.46        | 69.73        | 67.22        | 65.87        | 64.15        | 63.42        | 62.57        | 61.89        | 62.54        | 63.31        | 63.87        |
| MAPLS-APL-soft (Ours) | 71.32        | 69.58        | 67.34        | 66.00        | <b>64.59</b> | <b>63.94</b> | <b>63.46</b> | <b>63.01</b> | <b>63.59</b> | 64.59        | 65.23        |
| CIFAR100-10-LT        |              |              |              |              |              |              |              |              |              |              |              |
| Order                 | Forward      |              |              |              |              | Uniform      | Backward     |              |              |              |              |
| Imbalance Ratio       | 50           | 25           | 10           | 5            | 2            | 1            | 2            | 5            | 10           | 25           | 50           |
| Baseline              | 67.18        | 65.62        | 63.12        | 60.63        | 57.50        | 54.75        | 52.14        | 48.50        | 45.61        | 43.16        | 40.91        |
| MLLS-hard             | <b>67.51</b> | 65.58        | 62.64        | 60.29        | 57.82        | 56.01        | 54.70        | 53.29        | 52.40        | 52.98        | 53.11        |
| MLLS-soft             | 67.24        | 65.38        | 62.60        | 60.31        | 57.91        | 56.57        | 55.70        | 54.11        | <b>53.88</b> | <b>55.30</b> | <b>55.38</b> |
| BBSE-hard             | 66.86        | 65.10        | 62.33        | 60.31        | 57.85        | 56.58        | 55.50        | 54.32        | 53.40        | 54.84        | 55.25        |
| BBSE-soft             | 67.33        | 65.48        | 62.82        | 60.43        | 58.04        | 56.69        | 55.64        | 54.10        | 53.55        | 54.89        | 55.53        |
| RLLS-hard             | 67.18        | 65.62        | 63.12        | 60.63        | 57.50        | 54.75        | 52.14        | 48.50        | 45.61        | 43.16        | 40.91        |
| RLLS-soft             | 67.18        | <b>65.62</b> | <b>63.12</b> | <b>60.63</b> | 57.50        | 54.75        | 52.14        | 48.50        | 45.61        | 43.16        | 40.91        |
| MAPLS-APL-hard (Ours) | 67.33        | 65.46        | 62.75        | 60.52        | 58.29        | 56.83        | 55.49        | 53.71        | 52.48        | 52.22        | 52.00        |
| MAPLS-APL-soft (Ours) | 66.36        | 64.67        | 62.24        | 60.17        | <b>58.19</b> | <b>56.98</b> | <b>55.78</b> | <b>54.44</b> | 53.37        | 54.24        | 54.30        |

Table 17. Top1 Accuracy Performance on CIFAR100 and CIFAR100-LT dataset, with imbalance ratio  $R = \{2, 5, 10\}$ . Each reported values are averaging over 20 different shuffled and random sampled test set.

| CIFAR100-20-LT        |              |              |              |              |              |              |              |              |              |              |              |
|-----------------------|--------------|--------------|--------------|--------------|--------------|--------------|--------------|--------------|--------------|--------------|--------------|
| Order                 | Forward      |              |              |              |              | Uniform      | Backward     |              |              |              |              |
| Imbalance Ratio       | 50           | 25           | 10           | 5            | 2            | 1            | 2            | 5            | 10           | 25           | 50           |
| Baseline              | 65.65        | 63.02        | 59.88        | 57.05        | 52.71        | 49.11        | 45.58        | 41.27        | 38.26        | 34.73        | 32.47        |
| MLLS-hard             | 64.98        | 62.15        | 59.14        | 56.45        | 52.97        | 50.49        | 48.58        | 47.05        | 46.33        | 45.67        | 45.36        |
| MLLS-soft             | 64.42        | 61.45        | 58.59        | 56.52        | 53.45        | 51.63        | 49.97        | 48.72        | <b>48.48</b> | <b>48.68</b> | <b>48.45</b> |
| BBSE-hard             | 63.65        | 61.23        | 58.16        | 55.75        | 53.67        | 49.06        | 49.71        | 48.25        | 47.79        | 48.43        | 48.46        |
| BBSE-soft             | 64.54        | 61.72        | 58.76        | 56.61        | 53.70        | 51.40        | 49.86        | 48.56        | 47.79        | 48.07        | 48.35        |
| RLLS-hard             | 65.65        | 63.02        | 59.88        | 57.05        | 52.71        | 49.11        | 45.58        | 41.27        | 38.26        | 34.73        | 32.47        |
| RLLS-soft             | <b>65.65</b> | <b>63.02</b> | <b>59.88</b> | 57.05        | 52.71        | 49.11        | 45.58        | 41.27        | 38.26        | 34.73        | 32.47        |
| MAPLS-APL-hard (Ours) | 64.72        | 62.01        | 59.29        | <b>57.14</b> | 54.07        | 51.97        | 50.26        | 48.42        | 46.97        | 45.92        | 45.35        |
| MAPLS-APL-soft (Ours) | 63.65        | 60.98        | 58.43        | 56.44        | <b>54.03</b> | <b>52.48</b> | <b>50.86</b> | <b>49.20</b> | 48.35        | 48.04        | 47.51        |

  

| CIFAR100-50-LT        |              |              |              |              |              |              |              |              |              |              |              |
|-----------------------|--------------|--------------|--------------|--------------|--------------|--------------|--------------|--------------|--------------|--------------|--------------|
| Order                 | Forward      |              |              |              |              | Uniform      | Backward     |              |              |              |              |
| Imbalance Ratio       | 50           | 25           | 10           | 5            | 2            | 1            | 2            | 5            | 10           | 25           | 50           |
| Baseline              | 63.60        | 60.91        | 56.57        | 52.85        | 47.21        | 42.65        | 38.14        | 32.46        | 28.60        | 23.82        | 20.98        |
| MLLS-hard             | 62.74        | 59.90        | 55.79        | 52.59        | 47.90        | 44.56        | 41.57        | 38.20        | 36.20        | 33.73        | 32.52        |
| MLLS-soft             | 61.87        | 58.90        | 55.68        | 53.05        | 48.58        | 46.03        | 43.92        | 40.49        | 40.11        | 37.60        | <b>37.53</b> |
| BBSE-hard             | 54.09        | 37.72        | 27.03        | 45.20        | 25.17        | 25.23        | 20.70        | 21.41        | 17.59        | 15.96        | 20.33        |
| BBSE-soft             | 60.58        | 58.57        | 52.37        | 52.78        | 30.25        | 40.54        | 40.12        | 34.56        | 29.89        | 27.73        | 32.36        |
| RLLS-hard             | <b>63.60</b> | <b>60.90</b> | <b>56.57</b> | 52.85        | 47.20        | 42.59        | 38.13        | 32.54        | 28.56        | 23.67        | 20.98        |
| RLLS-soft             | 63.60        | 60.90        | 56.57        | 52.85        | 47.21        | 42.65        | 38.14        | 32.46        | 28.62        | 23.80        | 20.98        |
| MAPLS-APL-hard (Ours) | 62.31        | 59.67        | 56.28        | <b>53.45</b> | <b>49.44</b> | 46.52        | 43.94        | 40.60        | 38.54        | 35.56        | 34.17        |
| MAPLS-APL-soft (Ours) | 60.60        | 57.77        | 55.04        | 52.72        | 49.11        | <b>46.98</b> | <b>44.91</b> | <b>41.84</b> | <b>40.99</b> | <b>38.12</b> | 37.45        |

  

| CIFAR100-100-LT       |              |              |              |              |              |              |              |              |              |              |              |
|-----------------------|--------------|--------------|--------------|--------------|--------------|--------------|--------------|--------------|--------------|--------------|--------------|
| Order                 | Forward      |              |              |              |              | Uniform      | Backward     |              |              |              |              |
| Imbalance Ratio       | 50           | 25           | 10           | 5            | 2            | 1            | 2            | 5            | 10           | 25           | 50           |
| Baseline              | 67.28        | 64.02        | 58.48        | 53.87        | 47.18        | 41.76        | 36.24        | 29.35        | 25.00        | 19.91        | 16.40        |
| MLLS-hard             | 64.52        | 61.48        | 56.67        | 53.02        | 48.53        | 45.09        | 41.77        | 37.98        | 36.03        | 34.63        | 33.94        |
| MLLS-soft             | 65.64        | 62.55        | 58.22        | 54.43        | 49.62        | 46.07        | 42.47        | 38.80        | 36.36        | 35.27        | 33.93        |
| BBSE-hard             | 41.42        | 34.08        | 42.00        | 33.25        | 16.48        | 23.44        | 21.76        | 18.68        | 23.48        | 14.65        | 17.58        |
| BBSE-soft             | 63.97        | 28.54        | 40.39        | 48.33        | 25.90        | 20.57        | 24.02        | 30.18        | 24.94        | 26.02        | 24.12        |
| RLLS-hard             | <b>67.29</b> | <b>64.02</b> | <b>58.48</b> | 53.87        | 47.18        | 41.76        | 36.22        | 29.37        | 25.00        | 19.91        | 16.40        |
| RLLS-soft             | 67.28        | 64.02        | 58.48        | 53.87        | 47.17        | 41.76        | 36.24        | 29.36        | 25.02        | 19.91        | 16.43        |
| MAPLS-APL-hard (Ours) | 64.98        | 62.04        | 58.17        | 55.13        | 51.26        | 48.10        | 45.03        | 41.38        | 39.35        | 37.20        | 35.69        |
| MAPLS-APL-soft (Ours) | 64.88        | 61.57        | 58.03        | <b>55.21</b> | <b>51.62</b> | <b>48.57</b> | <b>45.58</b> | <b>42.12</b> | <b>39.83</b> | <b>37.69</b> | <b>35.96</b> |

  

| CIFAR100-200-LT       |              |              |              |              |              |              |              |              |              |              |              |
|-----------------------|--------------|--------------|--------------|--------------|--------------|--------------|--------------|--------------|--------------|--------------|--------------|
| Order                 | Forward      |              |              |              |              | Uniform      | Backward     |              |              |              |              |
| Imbalance Ratio       | 50           | 25           | 10           | 5            | 2            | 1            | 2            | 5            | 10           | 25           | 50           |
| Baseline              | 63.82        | 60.19        | 54.47        | 49.59        | 42.21        | 36.59        | 31.01        | 24.13        | 19.33        | 14.48        | 11.38        |
| MLLS-hard             | 60.72        | 57.24        | 52.34        | 48.32        | 41.69        | 37.22        | 32.97        | 27.94        | 25.63        | 23.56        | 22.05        |
| MLLS-soft             | 61.68        | 58.94        | 53.32        | 49.48        | 43.39        | 39.37        | 35.05        | 30.31        | 27.05        | 25.00        | 22.76        |
| BBSE-hard             | 35.57        | 26.79        | 26.55        | 23.58        | 28.65        | 18.59        | 18.21        | 22.53        | 21.31        | 18.24        | 16.84        |
| BBSE-soft             | 50.93        | 30.32        | 46.57        | 19.40        | 38.04        | 22.80        | 22.96        | 23.37        | 18.04        | 21.16        | 13.43        |
| RLLS-hard             | 63.82        | 60.19        | 54.47        | 49.59        | 42.21        | 36.59        | 31.00        | 24.13        | 19.33        | 14.48        | 11.36        |
| RLLS-soft             | <b>63.82</b> | <b>60.19</b> | 54.47        | 49.59        | 42.21        | 36.59        | 31.01        | 24.13        | 19.33        | 14.48        | 11.38        |
| MAPLS-APL-hard (Ours) | 61.56        | 58.72        | <b>54.69</b> | 51.10        | 45.64        | 41.75        | 37.67        | 32.54        | 29.12        | 25.30        | 23.28        |
| MAPLS-APL-soft (Ours) | 61.71        | 59.04        | 54.60        | <b>51.11</b> | <b>46.37</b> | <b>42.81</b> | <b>38.70</b> | <b>33.94</b> | <b>30.72</b> | <b>27.16</b> | <b>23.90</b> |

Table 18. Top1 Accuracy Performance on CIFAR100-LT dataset, with imbalance ratio  $R = \{20, 50, 100, 200\}$ . Test set have ordered Long-Tailed shift.. Each reported values are averaging over 20 different shuffled and random sampled test set.





### F.3. Dirichlet Shifted test set

| Dataset                 | CIFAR100      |               |               |               |               |               | CIFAR100-2-LT |               |               |               |               |               | CIFAR100-5-LT |               |               |               |               |               |
|-------------------------|---------------|---------------|---------------|---------------|---------------|---------------|---------------|---------------|---------------|---------------|---------------|---------------|---------------|---------------|---------------|---------------|---------------|---------------|
| Test Dirichlet $\alpha$ | $\alpha = 10$ |               |               | $\alpha = 1$  |               |               | $\alpha = 10$ |               |               | $\alpha = 1$  |               |               | $\alpha = 10$ |               |               | $\alpha = 1$  |               |               |
| Test Sample No.         | 2500          | 5000          | 7500          | 2500          | 5000          | 7500          | 2500          | 5000          | 7500          | 2500          | 5000          | 7500          | 2500          | 5000          | 7500          | 2500          | 5000          | 7500          |
| MLLS-hard               | 0.0690        | 0.0532        | 0.0482        | 0.0702        | 0.0575        | 0.0576        | 0.0932        | 0.0689        | 0.0622        | 0.0946        | 0.0743        | 0.0726        | 0.2600        | 0.2111        | 0.2021        | 0.3109        | 0.2573        | 0.2506        |
| MLLS-soft               | 0.0448        | 0.0290        | 0.0244        | <b>0.0436</b> | <b>0.0307</b> | <b>0.0330</b> | 0.0634        | 0.0468        | 0.0365        | <b>0.0670</b> | <b>0.0542</b> | <b>0.0536</b> | 0.2060        | 0.1478        | 0.1511        | 0.2337        | 0.2013        | 0.1640        |
| BBSE-hard               | 0.0330        | 0.0281        | 0.0281        | 0.1792        | 0.1798        | 0.1744        | 0.0396        | 0.0332        | 0.0294        | 0.1813        | 0.1787        | 0.1754        | 0.0986        | 0.1011        | 0.0919        | 0.3597        | 0.3384        | 0.3033        |
| BBSE-soft               | <b>0.0290</b> | 0.0212        | 0.0199        | 0.0950        | 0.0910        | 0.0890        | <b>0.0383</b> | <b>0.0285</b> | <b>0.0223</b> | 0.0894        | 0.0795        | 0.0786        | <b>0.1034</b> | <b>0.0694</b> | <b>0.0717</b> | <b>0.1923</b> | <b>0.1658</b> | <b>0.1447</b> |
| RLLS-hard               | 0.1037        | 0.1024        | 0.1009        | 0.9902        | 1.0078        | 0.9966        | 0.1591        | 0.1627        | 0.1573        | 1.1288        | 1.1823        | 1.1718        | 0.6087        | 0.5633        | 0.5805        | 2.2550        | 2.1548        | 2.2429        |
| RLLS-soft               | 0.1037        | 0.1024        | 0.1009        | 0.9902        | 1.0078        | 0.9966        | 0.1591        | 0.1627        | 0.1573        | 1.1288        | 1.1823        | 1.1718        | 0.6087        | 0.5632        | 0.5805        | 2.2550        | 2.1547        | 2.2429        |
| MAPLS-APL-hard (ours)   | 0.0471        | 0.0372        | 0.0349        | 0.0808        | 0.0712        | 0.0713        | 0.0571        | 0.0447        | 0.0411        | 0.1091        | 0.0982        | 0.0970        | 0.1184        | 0.0981        | 0.1011        | 0.3486        | 0.3275        | 0.3000        |
| MAPLS-APL-soft (ours)   | 0.0308        | <b>0.0210</b> | <b>0.0188</b> | 0.0612        | 0.0538        | 0.0542        | 0.0398        | 0.0320        | 0.0282        | 0.0859        | 0.0747        | 0.0757        | 0.1192        | 0.1193        | 0.1164        | 0.2405        | 0.2369        | 0.2088        |

  

| Dataset                 | CIFAR100-10-LT |               |               |               |               |               | CIFAR100-20-LT |               |               |               |               |               | CIFAR100-50-LT    |                   |                   |                   |                   |                   |
|-------------------------|----------------|---------------|---------------|---------------|---------------|---------------|----------------|---------------|---------------|---------------|---------------|---------------|-------------------|-------------------|-------------------|-------------------|-------------------|-------------------|
| Test Dirichlet $\alpha$ | $\alpha = 10$  |               |               | $\alpha = 1$  |               |               | $\alpha = 10$  |               |               | $\alpha = 1$  |               |               | $\alpha = 10$     |                   |                   | $\alpha = 1$      |                   |                   |
| Test Sample No.         | 2500           | 5000          | 7500          | 2500          | 5000          | 7500          | 2500           | 5000          | 7500          | 2500          | 5000          | 7500          | 2500              | 5000              | 7500              | 2500              | 5000              | 7500              |
| MLLS-hard               | 0.6699         | 0.5618        | 0.5169        | 0.9042        | 0.9943        | 1.0304        | 2.0207         | 1.7062        | 1.6656        | 2.9207        | 3.0951        | 2.5477        | 11.93             | 11.36             | 11.70             | 22.20             | 19.33             | 17.51             |
| MLLS-soft               | 0.6194         | 0.5405        | 0.3526        | <b>0.7268</b> | 0.6015        | 0.7655        | 2.8273         | 2.2490        | 2.8149        | 1.8841        | <b>2.7385</b> | 1.9305        | 24.31             | 14.75             | 15.56             | 23.05             | 20.14             | 21.29             |
| BBSE-hard               | 0.3034         | 0.2696        | 0.7249        | 0.7961        | 0.7386        | 0.7871        | 13.4587        | 2.6115        | 3.8913        | 2.6597        | 4.0435        | 4.5142        | 1.4e <sup>7</sup> | 5.5e <sup>4</sup> | 1.5e <sup>5</sup> | 1.7e <sup>5</sup> | 9.9e <sup>4</sup> | 2.2e <sup>3</sup> |
| BBSE-soft               | 0.4020         | <b>0.2089</b> | 0.2595        | 0.5639        | <b>0.4615</b> | <b>0.6340</b> | 5.6748         | 1.3563        | 2.4176        | <b>1.5559</b> | 2.8628        | <b>1.5493</b> | 1.3e <sup>3</sup> | 97.03             | 4.4e <sup>3</sup> | 6.2e <sup>2</sup> | 75.57             | 2.4e <sup>3</sup> |
| RLLS-hard               | 1.7126         | 1.6543        | 1.6184        | 4.6657        | 4.6950        | 5.0918        | 4.8416         | 4.7709        | 4.6082        | 11.3887       | 11.7636       | 10.7253       | 18.70             | 18.59             | 19.25             | 41.60             | 36.61             | 36.57             |
| RLLS-soft               | 1.7126         | 1.6543        | 1.6184        | 4.6657        | 4.6950        | 5.0918        | 4.8418         | 4.7710        | 4.6083        | 11.3887       | 11.7636       | 10.7253       | 18.72             | 18.65             | 19.14             | 41.59             | 36.61             | 36.56             |
| MAPLS-APL-hard (ours)   | <b>0.2939</b>  | 0.2600        | <b>0.2455</b> | 1.1216        | 1.2356        | 1.3374        | <b>0.7200</b>  | <b>0.6593</b> | <b>0.6125</b> | 3.2722        | 3.6561        | 3.0976        | <b>3.24</b>       | <b>2.88</b>       | <b>3.13</b>       | 18.09             | <b>15.49</b>      | <b>14.54</b>      |
| MAPLS-APL-soft (ours)   | 0.4253         | 0.5086        | 0.4863        | 0.8567        | 0.8497        | 1.0113        | 1.6224         | 1.5438        | 1.8489        | 2.7654        | 3.1580        | 2.7714        | 10.04             | 9.30              | 8.34              | <b>17.89</b>      | 17.03             | 19.55             |

  

| Dataset                 | CIFAR100-100-LT   |                   |                   |                   |                   |                   | CIFAR100-200-LT   |                   |                   |                   |                   |                   | - |  |
|-------------------------|-------------------|-------------------|-------------------|-------------------|-------------------|-------------------|-------------------|-------------------|-------------------|-------------------|-------------------|-------------------|---|--|
| Test Dirichlet $\alpha$ | $\alpha = 10$     |                   |                   | $\alpha = 1$      |                   |                   | $\alpha = 10$     |                   |                   | $\alpha = 1$      |                   |                   | - |  |
| Test Sample No.         | 2500              | 5000              | 7500              | 2500              | 5000              | 7500              | 2500              | 5000              | 7500              | 2500              | 5000              | 7500              | - |  |
| MLLS-hard               | 55.20             | 52.00             | 48.73             | 71.50             | 62.18             | 63.34             | 436.79            | 428.50            | 429.92            | 536.44            | 571.00            | 508.16            |   |  |
| MLLS-soft               | 51.97             | 45.55             | 42.43             | 68.44             | 61.42             | 62.14             | 254.46            | 255.35            | 232.31            | 351.04            | 370.53            | 349.11            |   |  |
| BBSE-hard               | 3.2e <sup>8</sup> | 7.9e <sup>6</sup> | 1.6e <sup>4</sup> | 5.8e <sup>6</sup> | 4.8e <sup>5</sup> | 2.3e <sup>4</sup> | 2.3e <sup>6</sup> | 2.1e <sup>6</sup> | 2.3e <sup>5</sup> | 1.2e <sup>5</sup> | 2.7e <sup>6</sup> | 1.6e <sup>6</sup> |   |  |
| BBSE-soft               | 1.2e <sup>4</sup> | 2.3e <sup>4</sup> | 2.7e <sup>3</sup> | 2.5e <sup>3</sup> | 2.5e <sup>3</sup> | 3.4e <sup>4</sup> | 2.5e <sup>4</sup> | 1.3e <sup>3</sup> | 1.1e <sup>5</sup> | 3.1e <sup>5</sup> | 1.1e <sup>4</sup> | 5.7e <sup>6</sup> |   |  |
| RLLS-hard               | 56.02             | 57.64             | 56.13             | 120.79            | 108.03            | 112.63            | 206.15            | 207.55            | 201.14            | 382.66            | 435.33            | 356.78            |   |  |
| RLLS-soft               | 55.96             | 57.71             | 56.13             | 120.71            | 108.00            | 112.60            | 206.10            | 207.57            | 201.18            | 382.68            | 435.29            | 356.77            |   |  |
| MAPLS-APL-hard (ours)   | <b>5.47</b>       | <b>5.53</b>       | <b>5.48</b>       | <b>41.47</b>      | <b>38.81</b>      | <b>36.87</b>      | 43.01             | 42.58             | 37.98             | 203.42            | 245.97            | 184.70            |   |  |
| MAPLS-APL-soft (ours)   | 6.93              | 7.46              | 7.09              | 45.26             | 39.51             | 41.07             | <b>27.79</b>      | <b>25.59</b>      | <b>23.06</b>      | <b>186.10</b>     | <b>221.36</b>     | <b>170.88</b>     |   |  |

Table 21. Performance of label shift estimation error  $(w - \hat{w})^2 / K$  on CIFAR100 dataset and Long-Tailed CIFAR100 dataset with imbalance ratio  $R = \{2, 5, 10, 20, 50, 100, 200\}$ , with Dirichlet test set shift that have  $\alpha = \{1, 10\}$  and total test sample number  $\{2500, 5000, 7500\}$  in each setting. Each reported values are averaging over 50 different shuffle and random sampled test set.

| Dataset                 | CIFAR100      |              |              |              |              |              | CIFAR100-2-LT |              |              |              |              |              | CIFAR100-5-LT |              |              |              |              |              |
|-------------------------|---------------|--------------|--------------|--------------|--------------|--------------|---------------|--------------|--------------|--------------|--------------|--------------|---------------|--------------|--------------|--------------|--------------|--------------|
| Test Dirichlet $\alpha$ | $\alpha = 10$ |              |              | $\alpha = 1$ |              |              | $\alpha = 10$ |              |              | $\alpha = 1$ |              |              | $\alpha = 10$ |              |              | $\alpha = 1$ |              |              |
| Test Sample No.         | 2500          | 5000         | 7500         | 2500         | 5000         | 7500         | 2500          | 5000         | 7500         | 2500         | 5000         | 7500         | 2500          | 5000         | 7500         | 2500         | 5000         | 7500         |
| Baseline                | <b>70.59</b>  | 70.41        | 70.44        | 70.73        | 70.80        | 70.20        | 67.86         | 67.96        | 68.01        | 67.96        | 68.00        | 68.19        | 62.67         | 62.55        | 62.55        | 62.16        | 62.42        | 62.71        |
| MLLS-hard               | 69.98         | 70.06        | 70.21        | 73.97        | 74.34        | 73.78        | 67.24         | 67.68        | 67.85        | 71.20        | 71.53        | 71.75        | 62.68         | 62.72        | 62.94        | 66.52        | 67.09        | 67.19        |
| MLLS-soft               | 70.33         | 70.44        | 70.52        | <b>74.22</b> | <b>74.65</b> | <b>74.05</b> | 67.76         | 68.20        | 68.33        | <b>71.65</b> | <b>72.01</b> | <b>72.15</b> | 63.51         | 63.50        | 63.79        | <b>67.43</b> | <b>68.02</b> | <b>68.10</b> |
| BBSE-hard               | 70.53         | 70.53        | 70.53        | 73.59        | 73.80        | 73.17        | 68.08         | 68.37        | 68.39        | 71.15        | 71.34        | 71.45        | 63.88         | 63.70        | 63.88        | 66.76        | 67.25        | 67.24        |
| BBSE-soft               | 70.56         | <b>70.57</b> | 70.61        | 74.01        | 74.27        | 73.64        | 68.05         | 68.36        | 68.45        | 71.51        | 71.78        | 71.96        | 63.81         | 63.72        | 63.91        | 67.22        | 67.74        | 67.82        |
| RLLS-hard               | 70.59         | 70.41        | 70.44        | 70.73        | 70.80        | 70.20        | 67.86         | 67.96        | 68.01        | 67.96        | 68.00        | 68.19        | 62.67         | 62.55        | 62.55        | 62.16        | 62.42        | 62.71        |
| RLLS-soft               | 70.59         | 70.41        | 70.44        | 70.73        | 70.80        | 70.20        | 67.86         | 67.96        | 68.01        | 67.96        | 68.00        | 68.19        | 62.67         | 62.55        | 62.55        | 62.16        | 62.42        | 62.71        |
| MAPLS-APL-hard (ours)   | 70.28         | 70.28        | 70.39        | 74.01        | 74.24        | 73.69        | 67.74         | 68.03        | 68.14        | 71.21        | 71.49        | 71.71        | 63.57         | 63.47        | 63.59        | 66.45        | 66.93        | 67.04        |
| MAPLS-APL-soft (ours)   | 70.54         | 70.56        | <b>70.61</b> | 74.20        | 74.51        | 73.88        | <b>68.15</b>  | <b>68.41</b> | <b>68.47</b> | 71.62        | 71.87        | 72.05        | <b>64.19</b>  | <b>63.98</b> | <b>64.14</b> | 67.11        | 67.62        | 67.67        |

  

| Dataset                 | CIFAR100-10-LT |              |              |              |              |              | CIFAR100-20-LT |              |              |              |              |              | CIFAR100-50-LT |              |              |              |              |              |
|-------------------------|----------------|--------------|--------------|--------------|--------------|--------------|----------------|--------------|--------------|--------------|--------------|--------------|----------------|--------------|--------------|--------------|--------------|--------------|
| Test Dirichlet $\alpha$ | $\alpha = 10$  |              |              | $\alpha = 1$ |              |              | $\alpha = 10$  |              |              | $\alpha = 1$ |              |              | $\alpha = 10$  |              |              | $\alpha = 1$ |              |              |
| Test Sample No.         | 2500           | 5000         | 7500         | 2500         | 5000         | 7500         | 2500           | 5000         | 7500         | 2500         | 5000         | 7500         | 2500           | 5000         | 7500         | 2500         | 5000         | 7500         |
| Baseline                | 54.60          | 54.73        | 54.84        | 54.57        | 54.85        | 54.33        | 49.09          | 49.16        | 49.25        | 49.85        | 48.97        | 49.61        | 42.72          | 42.86        | 42.65        | 41.76        | 42.94        | 42.28        |
| MLLS-hard               | 56.02          | 56.51        | 56.64        | 59.81        | 60.16        | 59.81        | 50.89          | 51.10        | 51.18        | 55.41        | 55.03        | 55.43        | 44.81          | 45.11        | 45.02        | 47.81        | 48.69        | 48.30        |
| MLLS-soft               | 56.50          | 56.91        | 56.95        | <b>60.30</b> | <b>60.72</b> | <b>60.35</b> | 51.81          | 52.01        | 52.20        | <b>56.43</b> | <b>56.04</b> | <b>56.42</b> | 46.32          | 46.51        | 46.65        | <b>49.61</b> | <b>50.58</b> | <b>50.17</b> |
| BBSE-hard               | 56.63          | 57.01        | 56.81        | 59.89        | 60.39        | 59.73        | 50.11          | 52.07        | 51.96        | 55.82        | 55.15        | 55.54        | 24.82          | 26.26        | 25.05        | 23.63        | 32.35        | 36.75        |
| BBSE-soft               | 56.66          | 57.04        | 57.00        | 60.18        | 60.62        | 60.09        | 51.58          | 52.03        | 52.08        | 56.47        | 55.67        | 56.19        | 40.16          | 44.02        | 38.49        | 45.95        | 48.19        | 43.26        |
| RLLS-hard               | 54.60          | 54.73        | 54.84        | 54.57        | 54.85        | 54.33        | 49.09          | 49.16        | 49.25        | 49.85        | 48.97        | 49.61        | 42.68          | 42.82        | 42.59        | 41.70        | 42.93        | 42.27        |
| RLLS-soft               | 54.60          | 54.73        | 54.84        | 54.57        | 54.85        | 54.33        | 49.09          | 49.16        | 49.25        | 49.85        | 48.97        | 49.61        | 42.73          | 42.87        | 42.65        | 41.75        | 42.94        | 42.29        |
| MAPLS-APL-hard (ours)   | 56.68          | 56.93        | 56.98        | 59.54        | 59.67        | 59.30        | 52.15          | 52.31        | 52.36        | 55.25        | 54.65        | 55.15        | 46.81          | 46.87        | 46.73        | 48.01        | 48.92        | 48.34        |
| MAPLS-APL-soft (ours)   | <b>56.92</b>   | <b>57.11</b> | <b>57.02</b> | 59.71        | 59.93        | 59.54        | <b>52.63</b>   | <b>52.64</b> | <b>52.64</b> | 55.62        | 55.11        | 55.43        | <b>47.35</b>   | <b>47.29</b> | <b>47.15</b> | 48.94        | 49.63        | 49.05        |

  

| Dataset                 | CIFAR100-100-LT |              |              |              |              |              | CIFAR100-200-LT |              |              |              |              |              | -    |      |      |      |      |      |
|-------------------------|-----------------|--------------|--------------|--------------|--------------|--------------|-----------------|--------------|--------------|--------------|--------------|--------------|------|------|------|------|------|------|
| Test Dirichlet $\alpha$ | $\alpha = 10$   |              |              | $\alpha = 1$ |              |              | $\alpha = 10$   |              |              | $\alpha = 1$ |              |              | -    |      |      | -    |      |      |
| Test Sample No.         | 2500            | 5000         | 7500         | 2500         | 5000         | 7500         | 2500            | 5000         | 7500         | 2500         | 5000         | 7500         | 2500 | 5000 | 7500 | 2500 | 5000 | 7500 |
| Baseline                | 41.76           | 41.58        | 41.86        | 41.72        | 41.83        | 42.26        | 36.54           | 36.84        | 36.72        | 36.49        | 36.51        | 36.63        |      |      |      |      |      |      |
| MLLS-hard               | 44.69           | 45.12        | 45.46        | 49.46        | 49.98        | 50.10        | 37.17           | 37.80        | 37.85        | 41.98        | 41.88        | 42.25        |      |      |      |      |      |      |
| MLLS-soft               | 45.47           | 45.96        | 46.62        | 50.53        | 50.62        | 50.97        | 38.56           | 39.81        | 40.18        | 43.55        | 44.36        | 44.09        |      |      |      |      |      |      |
| BBSE-hard               | 23.57           | 29.21        | 26.14        | 18.09        | 25.43        | 25.86        | 20.50           | 21.44        | 26.67        | 24.96        | 21.26        | 19.18        |      |      |      |      |      |      |
| BBSE-soft               | 36.88           | 42.21        | 37.61        | 32.59        | 37.69        | 33.57        | 29.51           | 32.13        | 24.92        | 22.03        | 30.07        | 23.47        |      |      |      |      |      |      |
| RLLS-hard               | 41.71           | 41.58        | 41.86        | 41.76        | 41.83        | 42.25        | 36.53           | 36.81        | 36.72        | 36.49        | 36.49        | 36.63        |      |      |      |      |      |      |
| RLLS-soft               | 41.76           | 41.58        | 41.86        | 41.72        | 41.83        | 42.27        | 36.54           | 36.84        | 36.72        | 36.49        | 36.51        | 36.63        |      |      |      |      |      |      |
| MAPLS-APL-hard (ours)   | 47.91           | 48.04        | 48.30        | 50.41        | 50.89        | 51.13        | 41.67           | 42.13        | 42.05        | 44.29        | 43.91        | 44.45        |      |      |      |      |      |      |
| MAPLS-APL-soft (ours)   | <b>48.27</b>    | <b>48.44</b> | <b>48.85</b> | <b>50.89</b> | <b>51.18</b> | <b>51.52</b> | <b>42.54</b>    | <b>43.23</b> | <b>43.18</b> | <b>45.20</b> | <b>45.30</b> | <b>45.52</b> |      |      |      |      |      |      |

Table 22. Performance of Top1 Accuracy on CIFAR100 dataset and Long-Tailed CIFAR100 dataset with imbalance ratio  $R = \{2, 5, 10, 20, 50, 100, 200\}$ , with Dirichlet test set shift that have  $\alpha = \{1, 10\}$  and total test sample number  $\{2500, 5000, 7500\}$  in each setting. Each reported values are averaging over 50 different shuffled and random sampled test set.

## G. ImageNet and ImageNet-LT dataset results

### G.1. Ordered Long-Tailed test set

| Order                 | Forward       |               |               |               |               | Uniform       | Backward      |               |               |               |               |
|-----------------------|---------------|---------------|---------------|---------------|---------------|---------------|---------------|---------------|---------------|---------------|---------------|
| Imbalance Ratio       | 50            | 25            | 10            | 5             | 2             | 1             | 2             | 5             | 10            | 25            | 50            |
| MLLS-hard             | 0.1166        | 0.1052        | 0.0880        | 0.0799        | 0.0708        | 0.0705        | 0.0862        | 0.1169        | 0.1483        | 0.1962        | 0.2463        |
| MLLS-soft             | 0.1027        | 0.0927        | 0.0781        | 0.0690        | 0.0581        | 0.0575        | 0.0697        | 0.0962        | 0.1224        | 0.1744        | 0.2195        |
| BBSE-hard             | 0.1171        | 0.0972        | 0.0783        | 0.0669        | 0.0556        | 0.0529        | 0.0638        | 0.0903        | 0.1194        | 0.1725        | 0.2191        |
| BBSE-soft             | 0.1182        | 0.1010        | 0.0831        | 0.0727        | 0.0607        | 0.0600        | 0.0734        | 0.1037        | 0.1304        | 0.1850        | 0.2352        |
| RLLS-hard             | 1.0846        | 0.7676        | 0.4097        | 0.2018        | 0.0350        | 0.0059        | 0.0692        | 0.3012        | 0.5848        | 1.0887        | 1.5532        |
| RLLS-soft             | 1.0846        | 0.7676        | 0.4097        | 0.2018        | 0.0350        | <b>0.0059</b> | 0.0692        | 0.3012        | 0.5848        | 1.0887        | 1.5532        |
| MAPLS-APL-hard (ours) | 0.1068        | 0.0891        | 0.0664        | 0.0539        | 0.0422        | 0.0419        | 0.0572        | 0.0923        | 0.1298        | 0.1906        | 0.2508        |
| MAPLS-APL-soft (ours) | <b>0.0942</b> | <b>0.0777</b> | <b>0.0579</b> | <b>0.0453</b> | <b>0.0319</b> | 0.0296        | <b>0.0430</b> | <b>0.0743</b> | <b>0.1064</b> | <b>0.1629</b> | <b>0.2149</b> |

Table 23. Performance of  $(w - \hat{w})^2/K$  on ImageNet dataset, with Ordered Long-Tailed test set that have imbalance ratio  $R = \{50, 10, 5, 2\}$ . Each reported values are averaging over 20 different shuffled and random sampled test set.

| Order                 | Forward      |              |              |              |              | Uniform      | Backward     |              |              |              |              |
|-----------------------|--------------|--------------|--------------|--------------|--------------|--------------|--------------|--------------|--------------|--------------|--------------|
| Imbalance Ratio       | 50           | 25           | 10           | 5            | 2            | 1            | 2            | 5            | 10           | 25           | 50           |
| Baseline              | 78.18        | 78.16        | 77.66        | 77.32        | 76.70        | 76.13        | 75.47        | 74.63        | 73.96        | 72.96        | 72.29        |
| MLLS-hard             | 78.61        | 78.03        | 76.97        | 76.34        | 75.50        | 75.03        | 74.39        | 74.01        | 73.90        | 73.85        | 73.89        |
| MLLS-soft             | 78.82        | 78.25        | 77.16        | 76.55        | 75.75        | 75.27        | 74.70        | 74.33        | 74.28        | 74.18        | 74.35        |
| BBSE-hard             | 78.59        | 78.08        | 77.17        | 76.56        | 75.85        | 75.33        | 74.74        | 74.27        | 74.16        | 73.93        | 73.99        |
| BBSE-soft             | 78.53        | 77.94        | 77.01        | 76.51        | 75.70        | 75.22        | 74.64        | 74.27        | 74.15        | 73.90        | 73.93        |
| RLLS-hard             | 78.18        | 78.16        | 77.66        | 77.32        | 76.70        | 76.13        | 75.47        | 74.63        | 73.96        | 72.96        | 72.29        |
| RLLS-soft             | 78.18        | 78.16        | <b>77.66</b> | <b>77.32</b> | <b>76.70</b> | <b>76.13</b> | <b>75.47</b> | <b>74.63</b> | 73.96        | 72.96        | 72.29        |
| MAPLS-APL-hard (ours) | 78.83        | 78.31        | 77.30        | 76.66        | 75.86        | 75.37        | 74.75        | 74.26        | 74.13        | 74.05        | 74.02        |
| MAPLS-APL-soft (ours) | <b>79.05</b> | <b>78.46</b> | 77.48        | 76.81        | 76.06        | 75.56        | 74.99        | 74.58        | <b>74.48</b> | <b>74.32</b> | <b>74.42</b> |

Table 24. Top1 Accuracy on ImageNet dataset, with Ordered Long-Tailed test set with ordered Long-Tailed test set that have imbalance ratio  $R = \{50, 10, 5, 2\}$ . Each reported values are averaging over 20 different shuffled and random sampled test set.

| Order                 | Forward     |             |             |             |             | Uniform     | Backward    |              |              |              |              |
|-----------------------|-------------|-------------|-------------|-------------|-------------|-------------|-------------|--------------|--------------|--------------|--------------|
| Imbalance Ratio       | 50          | 25          | 10          | 5           | 2           | 1           | 2           | 5            | 10           | 25           | 50           |
| MLLS-hard             | 2.62        | 3.72        | 6.27        | 8.87        | 14.92       | 23.47       | 37.96       | 67.16        | 99.08        | 153.10       | 201.93       |
| MLLS-soft             | 51.76       | 48.34       | 54.89       | 45.71       | 84.10       | 77.53       | 107.90      | 137.84       | 184.96       | 251.67       | 262.78       |
| BBSE-hard             | $9.4e^6$    | $1.0e^7$    | $2.0e^7$    | $5.7e^7$    | $5.4e^9$    | $9.1e^5$    | $1.8e^6$    | $1.4e^7$     | $7.0e^4$     | $1.7e^8$     | $1.9e^8$     |
| BBSE-soft             | 1.67        | 2.01        | 2.69        | 2.80        | 5.54        | 10.55       | 19.80       | 42.96        | 63.91        | 102.84       | 152.85       |
| RLLS-hard             | 0.08        | 0.11        | 0.87        | 2.77        | 9.14        | 18.95       | 35.57       | 71.96        | 112.43       | 184.69       | 252.85       |
| RLLS-soft             | <b>0.08</b> | <b>0.11</b> | <b>0.87</b> | 2.77        | 9.14        | 18.95       | 35.57       | 71.95        | 112.43       | 184.69       | 253.38       |
| MAPLS-APL-hard (ours) | 4.34        | 4.22        | 3.55        | <b>2.41</b> | <b>1.01</b> | <b>1.70</b> | 6.53        | 23.03        | 44.85        | 87.83        | 130.65       |
| MAPLS-APL-soft (ours) | 14.28       | 14.02       | 12.89       | 10.49       | 6.59        | 3.65        | <b>4.21</b> | <b>12.34</b> | <b>26.16</b> | <b>54.83</b> | <b>83.57</b> |

Table 25. Performance of  $(w - \hat{w})^2/K$  on ImageNet-LT dataset, with ordered Long-Tailed test set that have imbalance ratio  $R = \{50, 10, 5, 2\}$ . Each reported values are averaging over 20 different shuffled and random sampled test set.

| Order                 | Forward      |              |              |              |              | Uniform      | Backward     |              |              |              |              |
|-----------------------|--------------|--------------|--------------|--------------|--------------|--------------|--------------|--------------|--------------|--------------|--------------|
| Imbalance Ratio       | 50           | 25           | 10           | 5            | 2            | 1            | 2            | 5            | 10           | 25           | 50           |
| Baseline              | <b>65.24</b> | <b>62.55</b> | <b>58.48</b> | 54.97        | 49.59        | 45.31        | 40.94        | 35.22        | 31.31        | 26.56        | 23.58        |
| MLLS-hard             | 61.78        | 59.10        | 55.42        | 52.70        | 48.93        | 46.47        | 44.04        | 41.27        | 39.82        | 38.30        | 37.39        |
| MLLS-soft             | 60.86        | 58.45        | 54.70        | 52.13        | 48.56        | 46.34        | 44.11        | 41.66        | 40.41        | 39.30        | 39.03        |
| BBSE-hard             | 34.03        | 33.20        | 25.93        | 24.53        | 19.03        | 26.15        | 23.99        | 16.85        | 28.03        | 15.67        | 12.92        |
| BBSE-soft             | 63.45        | 60.95        | 57.47        | 54.86        | 51.03        | 48.23        | 45.67        | 42.47        | 40.42        | 37.94        | 36.34        |
| RLLS-hard             | 65.24        | 62.55        | 58.48        | 54.97        | 49.59        | 45.31        | 40.94        | 35.22        | 31.31        | 26.56        | 23.58        |
| RLLS-soft             | 65.24        | 62.55        | 58.48        | 54.97        | 49.59        | 45.31        | 40.94        | 35.22        | 31.31        | 26.56        | 23.58        |
| MAPLS-APL-hard (ours) | 62.92        | 60.67        | 57.72        | 55.56        | 52.51        | 50.31        | 48.05        | 45.09        | 43.33        | 41.31        | 39.79        |
| MAPLS-APL-soft (ours) | 62.47        | 60.34        | 57.58        | <b>55.44</b> | <b>52.50</b> | <b>50.32</b> | <b>48.33</b> | <b>45.69</b> | <b>44.21</b> | <b>42.50</b> | <b>41.57</b> |

Table 26. Top1 Accuracy on ImageNet-LT dataset, with Ordered Long-Tailed test set with ordered Long-Tailed test set that have imbalance ratio  $R = \{50, 10, 5, 2\}$ . Each reported values are averaging over 20 different shuffled and random sampled test set.

## G.2. Shuffled Long-Tailed test set

| Dataset               | ImageNet             |               |               |               |               | ImageNet-LT  |              |              |             |             |
|-----------------------|----------------------|---------------|---------------|---------------|---------------|--------------|--------------|--------------|-------------|-------------|
|                       | Test imbalance ratio | 50            | 20            | 10            | 5             | 2            | 50           | 20           | 10          | 5           |
| MLLS-hard             | 0.1210               | 0.1102        | 0.1001        | 0.0868        | 0.0766        | 36.09        | 34.49        | 30.57        | 26.90       | 24.42       |
| MLLS-soft             | <b>0.1121</b>        | 0.0972        | 0.0868        | 0.0721        | 0.0637        | 80.66        | 82.10        | 84.92        | 81.54       | 76.59       |
| BBSE-hard             | 0.1285               | 0.1020        | 0.0871        | 0.0699        | 0.0581        | $3.2e^5$     | $1.8e^6$     | $1.4e^6$     | $2.0e^7$    | $4.8e^5$    |
| BBSE-soft             | 0.1305               | 0.1086        | 0.0969        | 0.0790        | 0.0671        | 28.00        | 25.48        | 18.04        | 15.86       | 12.07       |
| RLLS-hard             | 1.1450               | 0.7160        | 0.4436        | 0.2244        | 0.0473        | 45.00        | 38.77        | 29.99        | 24.18       | 19.96       |
| RLLS-soft             | 1.1450               | 0.7160        | 0.4436        | 0.2244        | 0.0473        | 45.00        | 38.77        | 29.98        | 24.18       | 19.96       |
| MAPLS-APL-hard (Ours) | 0.1236               | 0.1006        | 0.0816        | 0.0633        | 0.0482        | 20.25        | 16.62        | <b>10.26</b> | <b>6.18</b> | <b>2.62</b> |
| MAPLS-APL-soft (Ours) | 0.1144               | <b>0.0904</b> | <b>0.0710</b> | <b>0.0521</b> | <b>0.0370</b> | <b>19.48</b> | <b>16.39</b> | 11.23        | 7.58        | 4.43        |

Table 27. Performance of label shift estimation error  $(w - \hat{w})^2 / K$  on ImageNet and ImageNet-LT dataset, with shuffled Long-Tailed test set that have imbalance ratio  $R = \{50, 10, 5, 2\}$ . Each reported values are averaging over 50 different shuffled and random sampled test set.

| Dataset               | ImageNet             |              |              |              |              | ImageNet-LT  |              |              |              |              |
|-----------------------|----------------------|--------------|--------------|--------------|--------------|--------------|--------------|--------------|--------------|--------------|
|                       | Test imbalance ratio | 50           | 20           | 10           | 5            | 2            | 50           | 20           | 10           | 5            |
| Baseline              | 76.02                | 76.05        | 76.10        | <b>76.17</b> | <b>76.10</b> | 45.40        | 45.24        | 45.16        | 45.30        | 45.31        |
| MLLS-hard             | 78.12                | 76.98        | 76.21        | 75.63        | 75.04        | 51.89        | 50.05        | 48.28        | 47.42        | 46.56        |
| MLLS-soft             | 78.33                | 77.21        | 76.46        | 75.90        | 75.28        | 52.05        | 50.02        | 48.34        | 47.23        | 46.53        |
| BBSE-hard             | 77.91                | 77.03        | 76.40        | 75.91        | 75.36        | 33.27        | 29.10        | 26.63        | 17.97        | 31.62        |
| BBSE-soft             | 77.74                | 76.82        | 76.26        | 75.81        | 75.22        | 52.40        | 51.05        | 49.86        | 49.01        | 48.37        |
| RLLS-hard             | 76.02                | 76.05        | 76.10        | 76.17        | 76.10        | 45.40        | 45.24        | 45.16        | 45.30        | 45.31        |
| RLLS-soft             | 76.02                | 76.05        | 76.10        | 76.17        | 76.10        | 45.40        | 45.24        | 45.16        | 45.30        | 45.31        |
| MAPLS-APL-hard (Ours) | 78.21                | 77.16        | 76.46        | 75.93        | 75.36        | 53.36        | 52.10        | 51.09        | 50.67        | 50.30        |
| MAPLS-APL-soft (Ours) | <b>78.38</b>         | <b>77.37</b> | <b>76.69</b> | 76.14        | 75.59        | <b>53.78</b> | <b>52.35</b> | <b>51.46</b> | <b>50.85</b> | <b>50.47</b> |

Table 28. Top1 Accuracy Performance on ImageNet and ImageNet-LT dataset, with shuffled Long-Tailed test set that have imbalance ratio  $R = \{50, 10, 5, 2\}$ . Each reported values are averaging over 50 different shuffled and random sampled test set.

### G.3. Dirichlet Shifted test set

| Dataset                        | ImageNet      |               |               |               |               |               | ImageNet-LT |             |             |              |              |              |
|--------------------------------|---------------|---------------|---------------|---------------|---------------|---------------|-------------|-------------|-------------|--------------|--------------|--------------|
| $\alpha$                       | 10.0          |               |               | 1.0           |               |               | 10.0        |             |             | 1.0          |              |              |
| Test Sample No.                | 12500         | 25000         | 37500         | 12500         | 25000         | 37500         | 12500       | 25000       | 37500       | 12500        | 25000        | 37500        |
| MLLS-hard                      | 0.1111        | 0.0848        | 0.0778        | 0.1299        | 0.1113        | 0.1071        | 28.44       | 26.03       | 24.66       | 38.21        | 36.18        | 35.89        |
| MLLS-soft                      | 0.0981        | 0.0721        | 0.0643        | <b>0.1154</b> | <b>0.0977</b> | <b>0.0920</b> | 91.28       | 83.62       | 92.95       | 82.62        | 84.23        | 84.28        |
| BBSE-hard                      | 0.0869        | 0.0661        | 0.0608        | 0.1285        | 0.1173        | 0.1118        | $4.8e^5$    | $1.0e^7$    | $5.7e^6$    | $1.7e^6$     | $1.2e^4$     | $1.5e^7$     |
| BBSE-soft                      | 0.1052        | 0.0769        | 0.0689        | 0.1366        | 0.1177        | 0.1099        | 13.84       | 12.89       | 13.15       | 28.30        | 27.75        | 27.42        |
| RLLS-hard                      | 0.1159        | 0.1122        | 0.1089        | 1.1020        | 1.0607        | 1.0330        | 21.98       | 21.05       | 21.21       | 46.05        | 45.75        | 45.50        |
| RLLS-soft                      | 0.1159        | 0.1122        | 0.1089        | 1.1020        | 1.0607        | 1.0330        | 21.98       | 21.05       | 21.21       | 46.05        | 45.75        | 45.50        |
| MAPLS-APL-hard ( <b>Ours</b> ) | 0.0736        | 0.0570        | 0.0524        | 0.1283        | 0.1142        | 0.1123        | <b>4.72</b> | <b>3.86</b> | <b>3.72</b> | 21.16        | 20.68        | 20.50        |
| MAPLS-APL-soft ( <b>Ours</b> ) | <b>0.0628</b> | <b>0.0465</b> | <b>0.0413</b> | 0.1160        | 0.1025        | 0.0999        | 6.62        | 5.66        | 5.64        | <b>18.94</b> | <b>18.75</b> | <b>19.32</b> |

Table 29. Performance of label shift estimation error  $(w - \hat{w})^2/K$  on ImageNet and ImageNet-LT dataset, with Dirichlet shifted test set with  $\alpha = 1.0, 10.0$  and sample number 12500, 25000, 37500. Each reported values are averaging over 50 different shuffled and random sampled test set.

| Dataset                        | ImageNet     |              |              |              |              |              | ImageNet-LT  |              |              |              |              |              |
|--------------------------------|--------------|--------------|--------------|--------------|--------------|--------------|--------------|--------------|--------------|--------------|--------------|--------------|
| $\alpha$                       | 10.0         |              |              | 1.0          |              |              | 10.0         |              |              | 1.0          |              |              |
| Test Sample No.                | 12500        | 25000        | 37500        | 12500        | 25000        | 37500        | 12500        | 25000        | 37500        | 12500        | 25000        | 37500        |
| Baseline                       | <b>76.13</b> | <b>76.15</b> | <b>76.11</b> | 76.21        | 76.20        | 75.98        | 45.26        | 45.34        | 45.28        | 45.27        | 45.26        | 45.16        |
| MLLS-hard                      | 74.80        | 75.20        | 75.28        | 78.01        | 78.08        | 77.93        | 45.94        | 46.68        | 46.95        | 50.91        | 51.20        | 51.13        |
| MLLS-soft                      | 75.09        | 75.44        | 75.53        | 78.25        | <b>78.37</b> | <b>78.16</b> | 45.70        | 46.58        | 46.83        | 51.04        | 51.23        | 51.27        |
| BBSE-hard                      | 75.22        | 75.51        | 75.58        | 77.94        | 78.02        | 77.83        | 31.15        | 20.76        | 24.76        | 30.57        | 18.31        | 25.88        |
| BBSE-soft                      | 75.00        | 75.36        | 75.47        | 77.88        | 77.98        | 77.75        | 48.13        | 48.51        | 48.66        | 51.65        | 51.87        | 51.70        |
| RLLS-hard                      | 76.13        | 76.15        | 76.11        | 76.21        | 76.20        | 75.98        | 45.26        | 45.34        | 45.28        | 45.27        | 45.26        | 45.16        |
| RLLS-soft                      | 76.13        | 76.15        | 76.11        | 76.21        | 76.20        | 75.98        | 45.26        | 45.34        | 45.28        | 45.27        | 45.26        | 45.16        |
| MAPLS-APL-hard ( <b>Ours</b> ) | 75.24        | 75.53        | 75.58        | 78.06        | 78.11        | 77.93        | 49.97        | 50.35        | 50.45        | 52.66        | 52.81        | 52.71        |
| MAPLS-APL-soft ( <b>Ours</b> ) | 75.49        | 75.74        | 75.80        | <b>78.27</b> | 78.35        | 78.14        | <b>50.13</b> | <b>50.53</b> | <b>50.59</b> | <b>53.01</b> | <b>53.12</b> | <b>53.05</b> |

Table 30. Top1 Accuracy Performance on ImageNet and ImageNet-LT dataset, with Dirichlet shifted test set with  $\alpha = 1.0, 10.0$  and sample number 12500, 25000, 37500. Each reported values are averaging over 50 different shuffled and random sampled test set.

## H. Places and Places-LT dataset results

### H.1. Ordered Long-Tailed test set

| Order                 | Forward       |               |               |               |               | Uniform       | Backward      |               |               |               |               |
|-----------------------|---------------|---------------|---------------|---------------|---------------|---------------|---------------|---------------|---------------|---------------|---------------|
| Imbalance Ratio       | 50            | 25            | 10            | 5             | 2             | 1             | 2             | 5             | 10            | 25            | 50            |
| MLLS-hard             | <b>0.1374</b> | <b>0.1265</b> | 0.1218        | 0.1181        | 0.1082        | 0.1048        | 0.1160        | 0.1342        | 0.1482        | 0.1628        | 0.1855        |
| MLLS-soft             | 0.1613        | 0.1440        | 0.1397        | 0.1288        | 0.1137        | 0.1080        | 0.1161        | 0.1324        | 0.1450        | 0.1636        | 0.1845        |
| BBSE-hard             | 1.4165        | 1.5820        | 1.5284        | 1.5041        | 1.4975        | 1.4484        | 1.4438        | 1.5558        | 1.4226        | 1.5014        | 1.3340        |
| BBSE-soft             | 0.2584        | 0.2204        | 0.2132        | 0.1919        | 0.1675        | 0.1576        | 0.1642        | 0.1846        | 0.1996        | 0.2221        | 0.2484        |
| RLLS-hard             | 1.0530        | 0.7509        | 0.4046        | 0.2011        | 0.0357        | 0.0053        | 0.0654        | 0.2873        | 0.5566        | 1.0297        | 1.4574        |
| RLLS-soft             | 1.0530        | 0.7509        | 0.4046        | 0.2011        | <b>0.0357</b> | <b>0.0053</b> | 0.0654        | 0.2873        | 0.5566        | 1.0297        | 1.4574        |
| MAPLS-APL-hard (ours) | 0.1642        | 0.1334        | <b>0.0918</b> | <b>0.0642</b> | 0.0398        | 0.0331        | <b>0.0425</b> | <b>0.0707</b> | <b>0.1002</b> | <b>0.1423</b> | <b>0.1836</b> |
| MAPLS-APL-soft (ours) | 0.1743        | 0.1426        | 0.1060        | 0.0795        | 0.0529        | 0.0445        | 0.0553        | 0.0843        | 0.1148        | 0.1582        | 0.2019        |

Table 31. Performance of  $(w - \hat{w})^2 / K$  on Places dataset, with Ordered Long-Tailed test set that have imbalance ratio  $R = \{50, 10, 5, 2\}$ . Each reported values are averaging over 20 different shuffled and random sampled test set.

| Order                 | Forward      |              |              |              |              | Uniform      | Backward     |       |              |              |              |
|-----------------------|--------------|--------------|--------------|--------------|--------------|--------------|--------------|-------|--------------|--------------|--------------|
| Imbalance Ratio       | 50           | 25           | 10           | 5            | 2            | 1            | 2            | 5     | 10           | 25           | 50           |
| Baseline              | 55.35        | 55.84        | 56.08        | 56.33        | 56.72        | 56.77        | 56.85        | 56.93 | 56.96        | 56.90        | 56.89        |
| MLLS-hard             | <b>60.70</b> | 59.45        | 57.50        | 56.27        | 55.66        | 55.53        | 55.87        | 57.11 | 58.53        | 60.39        | 61.94        |
| MLLS-soft             | 60.64        | <b>59.47</b> | 57.60        | 56.55        | 55.77        | 55.59        | 55.92        | 57.21 | 58.53        | <b>60.50</b> | <b>62.13</b> |
| BBSE-hard             | 55.99        | 54.55        | 52.72        | 51.75        | 50.92        | 50.82        | 51.21        | 52.75 | 54.14        | 56.20        | 58.05        |
| BBSE-soft             | 60.08        | 58.80        | 57.00        | 55.90        | 55.26        | 55.06        | 55.29        | 56.52 | 57.87        | 59.94        | 61.69        |
| RLLS-hard             | 55.35        | 55.84        | 56.08        | 56.33        | 56.72        | 56.77        | 56.85        | 56.93 | 56.96        | 56.90        | 56.89        |
| RLLS-soft             | 55.35        | 55.84        | 56.08        | 56.33        | <b>56.72</b> | <b>56.77</b> | <b>56.85</b> | 56.93 | 56.96        | 56.90        | 56.89        |
| MAPLS-APL-hard (ours) | 60.38        | 59.35        | 57.77        | 56.84        | 56.32        | 56.31        | 56.61        | 57.61 | <b>58.84</b> | 60.44        | 61.71        |
| MAPLS-APL-soft (ours) | 60.34        | 59.37        | <b>57.84</b> | <b>56.91</b> | 56.35        | 56.24        | 56.55        | 57.63 | 58.75        | 60.41        | 61.78        |

Table 32. Top1 Accuracy on Places dataset, with Ordered Long-Tailed test set with ordered Long-Tailed test set that have imbalance ratio  $R = \{50, 10, 5, 2\}$ . Each reported values are averaging over 20 different shuffled and random sampled test set.

| Order<br>Imbalance Ratio | Forward       |               |               |               |               | Uniform       | Backward       |                |                |                 |                 |
|--------------------------|---------------|---------------|---------------|---------------|---------------|---------------|----------------|----------------|----------------|-----------------|-----------------|
|                          | 50            | 25            | 10            | 5             | 2             | 1             | 2              | 5              | 10             | 25              | 50              |
| MLLS-hard                | 3.4675        | 5.4574        | 9.5617        | 17.7925       | 39.9483       | 70.8934       | 120.5449       | 223.9239       | 333.2823       | 525.0909        | 698.2303        |
| MLLS-soft                | 7.4563        | 8.1166        | 13.6317       | 27.9751       | 47.4603       | 104.0224      | 158.3961       | 291.3247       | 373.9417       | 628.1687        | 818.2384        |
| BBSE-hard                | $1.9e^5$      | $4.5e^5$      | $7.6e^5$      | $1.9e^5$      | $1.0e^5$      | $9.7e^3$      | $6.3e^4$       | $8.6e^4$       | $8.0e^6$       | $2.3e^5$        | $1.4e^5$        |
| BBSE-soft                | 1.1017        | 2.2796        | 5.3919        | 9.9850        | 26.8099       | 51.1293       | 85.8800        | 171.5911       | 255.1838       | 409.3291        | 571.0979        |
| RLLS-hard                | <b>0.2672</b> | <b>1.0802</b> | <b>4.8371</b> | 12.2802       | 34.8413       | 68.2377       | 122.7763       | 237.4952       | 361.1785       | 561.5883        | 769.9876        |
| RLLS-soft                | 0.2672        | 1.0803        | 4.8413        | 12.2805       | 34.8417       | 68.2382       | 122.7766       | 237.4960       | 361.1791       | 575.2623        | 769.9874        |
| MAPLS-APL-hard (ours)    | 10.4254       | 9.2915        | 6.1466        | <b>3.0678</b> | <b>1.2933</b> | 6.9923        | 26.4801        | 85.6515        | 162.4542       | 311.1073        | 455.9404        |
| MAPLS-APL-soft (ours)    | 23.6750       | 22.3458       | 18.6892       | 14.4898       | 5.7818        | <b>3.3824</b> | <b>10.1801</b> | <b>48.5159</b> | <b>97.1170</b> | <b>218.3957</b> | <b>358.1589</b> |

Table 33. Performance of  $(w - \hat{w})^2/K$  on Places-LT dataset, with ordered Long-Tailed test set that have imbalance ratio  $R = \{50, 10, 5, 2\}$ . Each reported values are averaging over 20 different shuffled and random sampled test set.

| Order<br>Imbalance Ratio | Forward      |              |              |              |              | Uniform      | Backward     |              |              |              |              |
|--------------------------|--------------|--------------|--------------|--------------|--------------|--------------|--------------|--------------|--------------|--------------|--------------|
|                          | 50           | 25           | 10           | 5            | 2            | 1            | 2            | 5            | 10           | 25           | 50           |
| Baseline                 | <b>43.36</b> | 41.25        | 38.04        | 35.11        | 31.06        | 27.92        | 24.76        | 20.89        | 18.26        | 15.49        | 13.46        |
| MLLS-hard                | 42.26        | 40.46        | 37.78        | 35.67        | 32.95        | 31.08        | 29.22        | 26.85        | 25.30        | 23.70        | 22.57        |
| MLLS-soft                | 41.77        | 39.90        | 37.20        | 35.06        | 32.43        | 30.53        | 28.72        | 26.58        | 25.50        | 24.11        | 22.85        |
| BBSE-hard                | 28.42        | 28.65        | 28.39        | 27.83        | 26.37        | 26.79        | 24.51        | 23.09        | 16.69        | 17.60        | 18.44        |
| BBSE-soft                | 43.00        | 41.12        | 38.32        | 36.18        | 33.16        | 30.94        | 28.75        | 26.16        | 24.34        | 22.31        | 20.54        |
| RLLS-hard                | 43.36        | 41.25        | 38.04        | 35.11        | 31.06        | 27.92        | 24.76        | 20.89        | 18.26        | 15.72        | 13.46        |
| RLLS-soft                | 43.36        | 41.25        | 38.04        | 35.11        | 31.06        | 27.92        | 24.76        | 20.89        | 18.26        | 15.49        | 13.46        |
| MAPLS-APL-hard (ours)    | 42.68        | <b>41.34</b> | <b>39.55</b> | <b>38.01</b> | <b>36.04</b> | 34.48        | 32.80        | 30.49        | 28.68        | 26.63        | 25.06        |
| MAPLS-APL-soft (ours)    | 42.48        | 41.15        | 39.32        | 37.78        | 36.04        | <b>34.58</b> | <b>32.97</b> | <b>30.87</b> | <b>29.35</b> | <b>27.41</b> | <b>25.63</b> |

Table 34. Top1 Accuracy on Places-LT dataset, with Ordered Long-Tailed test set with ordered Long-Tailed test set that have imbalance ratio  $R = \{50, 10, 5, 2\}$ . Each reported values are averaging over 20 different shuffled and random sampled test set.



## H.2. Shuffled Long-Tailed test set

| Dataset               | Places               |               |               |               |               | Places-LT      |                |                |                |               |
|-----------------------|----------------------|---------------|---------------|---------------|---------------|----------------|----------------|----------------|----------------|---------------|
|                       | Test imbalance ratio | 50            | 20            | 10            | 5             | 2              | 50             | 20             | 10             | 5             |
| MLLS-hard             | <b>0.1651</b>        | 0.1566        | 0.1252        | 0.1153        | 0.1105        | 115.1280       | 104.1143       | 98.8763        | 82.3951        | 74.4152       |
| MLLS-soft             | 0.1727               | 0.1622        | 0.1348        | 0.1299        | 0.1182        | 142.2334       | 141.6962       | 104.8241       | 107.7355       | 101.4559      |
| BBSE-hard             | 1.7527               | 1.8203        | 1.3491        | 1.5414        | 1.6365        | $6.8e^6$       | $4.7e^5$       | $2.6e^4$       | $2.3e^6$       | $1.1e^6$      |
| BBSE-soft             | 0.2757               | 0.2466        | 0.2011        | 0.1935        | 0.1693        | 102.0397       | 88.2631        | 81.8726        | 64.8671        | 55.9274       |
| RLLS-hard             | 1.0996               | 0.6918        | 0.4281        | 0.2214        | 0.0470        | 140.2524       | 118.2621       | 107.5960       | 84.7745        | 73.4672       |
| RLLS-soft             | 1.0996               | 0.6918        | 0.4281        | 0.2214        | 0.0470        | 140.0257       | 118.2626       | 107.5964       | 84.7749        | 73.4666       |
| MAPLS-APL-hard (Ours) | 0.1730               | <b>0.1304</b> | <b>0.0877</b> | <b>0.0613</b> | <b>0.0412</b> | 72.4649        | 52.5443        | 39.3145        | 21.9486        | 10.3899       |
| MAPLS-APL-soft (Ours) | 0.1891               | 0.1437        | 0.1058        | 0.0794        | 0.0558        | <b>65.7596</b> | <b>46.7970</b> | <b>31.5570</b> | <b>18.5238</b> | <b>6.2758</b> |

Table 35. Performance of label shift estimation error  $(w - \hat{w})^2 / K$  on Places and Places-LT dataset, with shuffled Long-Tailed test set that have imbalance ratio  $R = \{50, 10, 5, 2\}$ . Each reported values are averaging over 50 different shuffled and random sampled test set.

| Dataset               | Places               |              |              |              |              | Places-LT    |              |              |              |              |
|-----------------------|----------------------|--------------|--------------|--------------|--------------|--------------|--------------|--------------|--------------|--------------|
|                       | Test imbalance ratio | 50           | 20           | 10           | 5            | 2            | 50           | 20           | 10           | 5            |
| Baseline              | 56.36                | 56.31        | 57.00        | 56.95        | <b>56.78</b> | 27.81        | 27.80        | 27.45        | 28.03        | 27.80        |
| MLLS-hard             | 61.40                | 59.15        | 58.28        | 57.07        | 55.71        | 35.79        | 34.48        | 32.32        | 32.13        | 31.21        |
| MLLS-soft             | <b>61.50</b>         | 59.27        | 58.40        | 57.02        | 55.77        | 35.39        | 34.01        | 31.83        | 31.41        | 30.65        |
| BBSE-hard             | 56.43                | 54.25        | 53.63        | 52.27        | 50.89        | 19.31        | 22.21        | 26.80        | 20.89        | 20.47        |
| BBSE-soft             | 60.68                | 58.42        | 57.69        | 56.31        | 55.23        | 34.42        | 33.43        | 31.69        | 31.79        | 30.94        |
| RLLS-hard             | 56.36                | 56.31        | 57.00        | 56.95        | 56.78        | 27.81        | 27.80        | 27.45        | 28.03        | 27.80        |
| RLLS-soft             | 56.36                | 56.31        | 57.00        | 56.95        | 56.78        | 27.81        | 27.80        | 27.45        | 28.03        | 27.80        |
| MAPLS-APL-hard (Ours) | 61.23                | <b>59.31</b> | <b>58.67</b> | <b>57.59</b> | 56.46        | 36.51        | 35.94        | 34.52        | 34.85        | 34.46        |
| MAPLS-APL-soft (Ours) | 61.19                | 59.28        | 58.58        | 57.46        | 56.40        | <b>36.55</b> | <b>35.97</b> | <b>34.58</b> | <b>34.87</b> | <b>34.55</b> |

Table 36. Top1 Accuracy Performance on Places and Places-LT dataset, with shuffled Long-Tailed test set that have imbalance ratio  $R = \{50, 10, 5, 2\}$ . Each reported values are averaging over 50 different shuffled and random sampled test set.

### H.3. Dirichlet Shifted test set

| Dataset               | Places        |               |               |               |               |               | Places-LT      |                |                |                |                |                |
|-----------------------|---------------|---------------|---------------|---------------|---------------|---------------|----------------|----------------|----------------|----------------|----------------|----------------|
|                       | 10.0          |               |               | 1.0           |               |               | 10.0           |                |                | 1.0            |                |                |
|                       | 2500          | 5000          | 7500          | 2500          | 5000          | 7500          | 2500           | 5000           | 7500           | 2500           | 5000           | 7500           |
| MLLS-hard             | 0.3541        | 0.2263        | 0.1809        | 0.3312        | 0.2151        | 0.1778        | 82.8776        | 81.0168        | 80.1520        | 128.4708       | 123.9672       | 129.7458       |
| MLLS-soft             | 0.3985        | 0.2443        | 0.1953        | 0.3694        | 0.2422        | 0.1884        | 104.2574       | 106.8853       | 90.7455        | 148.7993       | 146.5841       | 156.8282       |
| BBSE-hard             | 1.7579        | 1.6217        | 1.6357        | 1.9250        | 1.8103        | 1.7504        | $1.6e^6$       | $9.8e^4$       | $9.6e^9$       | $1.6e^5$       | $2.2e^4$       | $49.9e^5$      |
| BBSE-soft             | 0.5594        | 0.3516        | 0.2858        | 0.5881        | 0.3807        | 0.3104        | 59.0054        | 58.1415        | 56.6426        | 108.3152       | 109.0846       | 112.5832       |
| RLLS-hard             | <b>0.1276</b> | 0.1158        | 0.1133        | 1.1764        | 1.0826        | 1.069         | 78.5794        | 77.8595        | 77.9273        | 150.6753       | 148.8841       | 152.7133       |
| RLLS-soft             | 0.1276        | 0.1158        | 0.1133        | 1.1764        | 1.0826        | 1.069         | 78.5799        | 77.8603        | 77.9278        | 150.6757       | 148.8845       | 152.7137       |
| MAPLS-APL-hard (Ours) | 0.1707        | <b>0.1038</b> | <b>0.0818</b> | <b>0.2716</b> | <b>0.1945</b> | <b>0.1684</b> | 19.0960        | 17.1211        | 16.0253        | 79.9565        | 77.0303        | 79.3220        |
| MAPLS-APL-soft (Ours) | 0.1940        | 0.1219        | 0.0973        | 0.2934        | 0.2150        | 0.1827        | <b>13.4071</b> | <b>12.2247</b> | <b>10.5204</b> | <b>69.5078</b> | <b>69.0457</b> | <b>69.4423</b> |

Table 37. Performance of label shift estimation error  $(w - \hat{w})^2/K$  on Places and Places-LT dataset, with Dirichlet shifted test set with  $\alpha = 1.0, 10.0$  and sample number 12500, 25000, 37500. Each reported values are averaging over 50 different shuffled and random sampled test set.

| Dataset               | Places       |              |              |              |              |              | Places-LT    |              |              |              |              |              |
|-----------------------|--------------|--------------|--------------|--------------|--------------|--------------|--------------|--------------|--------------|--------------|--------------|--------------|
|                       | 10.0         |              |              | 1.0          |              |              | 10.0         |              |              | 1.0          |              |              |
|                       | 2500         | 5000         | 7500         | 2500         | 5000         | 7500         | 2500         | 5000         | 7500         | 2500         | 5000         | 7500         |
| Baseline              | 56.80        | 56.90        | 56.79        | 56.64        | 56.81        | 56.71        | 27.80        | 27.94        | 27.85        | 28.18        | 27.94        | 28.03        |
| MLLS-hard             | 53.58        | 54.98        | 55.36        | 59.72        | 60.61        | 60.90        | 30.58        | 30.94        | 31.07        | 34.72        | 35.28        | 35.33        |
| MLLS-soft             | 53.40        | 55.00        | 55.35        | 59.59        | 60.56        | <b>60.93</b> | 30.19        | 30.33        | 30.64        | 34.35        | 35.04        | 34.98        |
| BBSE-hard             | 49.90        | 50.81        | 50.85        | 55.52        | 55.93        | 56.22        | 20.73        | 25.53        | 16.33        | 27.49        | 29.74        | 25.94        |
| BBSE-soft             | 52.47        | 54.05        | 54.47        | 58.65        | 59.71        | 60.10        | 33.80        | 34.08        | 34.09        | 33.80        | 34.08        | 34.09        |
| RLLS-hard             | 56.80        | 56.90        | 56.79        | 56.64        | 56.81        | 56.71        | 27.80        | 27.94        | 27.85        | 28.18        | 27.94        | 28.03        |
| RLLS-soft             | <b>56.80</b> | <b>56.90</b> | <b>56.79</b> | 56.64        | 56.81        | 56.71        | 27.80        | 27.94        | 27.85        | 28.18        | 27.94        | 28.03        |
| MAPLS-APL-hard (Ours) | 55.04        | 56.08        | 56.30        | <b>59.94</b> | <b>60.67</b> | 60.88        | 34.08        | 34.34        | 34.30        | 36.20        | 36.49        | 36.39        |
| MAPLS-APL-soft (Ours) | 54.96        | 56.08        | 56.25        | 59.88        | 60.61        | 60.85        | <b>34.16</b> | <b>34.29</b> | <b>34.36</b> | <b>36.27</b> | <b>36.58</b> | <b>36.44</b> |

Table 38. Top1 Accuracy Performance on Places and Places-LT dataset, with Dirichlet shifted test set with  $\alpha = 1.0, 10.0$  and sample number 12500, 25000, 37500. Each reported values are averaging over 50 different shuffled and random sampled test set.
